# Supplementary material for: Proteomic characterization of extracellular vesicles released by third stage larvae of the zoonotic parasite Anisakis pegreffii (Nematoda: Anisakidae)
Source: Front Cell Infect Microbiol. 2023 Mar 15;13:1079991. doi: 10.3389/fcimb.2023.1079991 (PMC10050594; doi:10.3389/fcimb.2023.1079991)
Supplement: Supplementary file 3 [file Table_1.xlsx]

## Sheet: Foglio1
S1 File. List of proteins identified by MS from EVs isolated from A. pegreffii L3.
Number of Idsa	Idsa	Sequence lengthsb	Peptide counts (all)c	Majority Idsd	Uniprot accession number of ortholog protein	Putative Protein Function	Peptidese	Razor + unique peptidesf	Unique peptidesg	Unique + razor sequence coverage [%]h	Unique sequence coverage [%]i	Mol. weight [kDa]j	Sequence lengthk	Scorel	Intensitym
12	A2.A5.R3297899.p1; A1.A3.NODE_41_length_5684_cov_2910.662599_g35_i0.p1; A1.A5.NODE_436_length_6149_cov_1424.420570_g223_i0.p1; A1.A1.NODE_496_length_6584_cov_1541.949670_g270_i0.p1; A1.A4.NODE_1584_length_4409_cov_5727.946429_g309_i1.p1; A1.A5.NODE_436_length_6149_cov_1424.420570_g223_i0.p2; A1.A4.NODE_1584_length_4409_cov_5727.946429_g309_i1.p2; A1.A1.NODE_496_length_6584_cov_1541.949670_g270_i0…	1677; 1462; 1190; 997; 333; 316; 237; 296; 154; 193; 193; 110	224; 190; 141; 124; 43; 37; 30; 30; 20; 19; 17; 9	A2.A5.R3297899.p1	KHN77828.1	Vitellogenin-6	224	224	37	87.5	18.5	194.56	1677	323.31	115590000000
7	A1.A4.NODE_4082_length_3273_cov_89.952661_g2229_i0.p1; A1.A0.NODE_6729_length_2218_cov_159.953768_g3601_i0.p1; A1.A6.NODE_8288_length_1815_cov_137.403695_g3906_i1.p1; A1.A0.NODE_6729_length_2218_cov_159.953768_g3601_i0.p3; A1.A5.NODE_23535_length_1061_cov_176.437132_g4784_i1.p1; A2.A5.S3351926.p1; A1.A0.NODE_9997_length_1691_cov_5.322127_g5421_i0.p1	530; 392; 346; 138; 113; 103; 518	73; 50; 44; 19; 11; 7; 7	A1.A4.NODE_4082_length_3273_cov_89.952661_g2229_i0.p1	A0A0M3K4H2	Glutamate dehydrogenase (NAD(P)(+))	73	73	69	92.8	89.2	58.723	530	323.31	66348000000
4	A2.A1.R3305669.p1; A2.A6.R1034995.p1; A1.A5.NODE_19285_length_1333_cov_4.325581_g8186_i0.p1; A1.A1.NODE_10757_length_2140_cov_209.520502_g144_i7.p1	3132; 286; 202; 282	324; 39; 29; 21	A2.A1.R3305669.p1	KHN80909.1	Apolipophorin	324	324	324	79.4	79.4	352.29	3132	323.31	89741000000
1	A1.A1.NODE_18173_length_1344_cov_1291.305403_g7678_i6.p1	332	47	A1.A1.NODE_18173_length_1344_cov_1291.305403_g7678_i6.p1	BAX39004.1	hemoglobin	47	47	47	82.5	82.5	39.075	332	323.31	33592000000
3	A2.A2.R682044.p1; A1.A0.NODE_13293_length_1286_cov_182.878960_g7357_i0.p2; A1.A1.NODE_21380_length_1079_cov_887.350791_g9779_i0.p1	1130; 173; 218	55; 9; 7	A2.A2.R682044.p1	A0A0M3KCN6	P-type domain-containing protein	55	55	5	56.5	5.4	127.88	1130	323.31	11875000000
1	A2.A0.R3469394.p1	948	69	A2.A0.R3469394.p1	A0A0M3K3Z8	Aminopeptidase	69	69	6	76.2	4.7	108.59	948	323.31	4457200000
12	A1.A1.NODE_191_length_8063_cov_392.550150_g115_i0.p1; A1.A1.NODE_241_length_7726_cov_354.775297_g115_i2.p1; A1.A1.NODE_241_length_7726_cov_354.775297_g115_i2.p2; A1.A4.NODE_3061_length_3631_cov_95.274652_g322_i3.p1; A2.A6.R1047919.p1; A1.A1.NODE_241_length_7726_cov_354.775297_g115_i2.p3; A1.A1.NODE_19829_length_1207_cov_486.114035_g8990_i0.p1; A2.A1.R3317207.p1; A1.A0.NODE_11594_length_1480_cov_1…	2333; 1422; 632; 430; 262; 178; 249; 1969; 108; 402; 550; 951	55; 38; 16; 12; 7; 4; 3; 2; 1; 1; 1; 1	A1.A1.NODE_191_length_8063_cov_392.550150_g115_i0.p1	F1KPY0	Carboxypeptidase	55	55	3	41	3.2	263.42	2333	323.31	2922800000
14	A1.A0.NODE_3851_length_2967_cov_1118.826236_g2098_i0.p1; A2.A4.R2374161.p1; A1.A0.NODE_4620_length_2712_cov_1162.970644_g2098_i4.p1; A1.A0.NODE_4085_length_2884_cov_1076.337575_g2098_i2.p1; A1.A0.NODE_4043_length_2900_cov_1092.503339_g2098_i1.p1; A1.A0.NODE_4408_length_2775_cov_1109.530515_g2098_i3.p3; A1.A0.NODE_7009_length_2165_cov_532.574408_g3757_i0.p1; A1.A5.NODE_7311_length_2547_cov_136.851…	413; 440; 401; 338; 292; 189; 184; 209; 231; 233; 159; 150; 119; 128	27; 27; 22; 18; 16; 13; 11; 11; 11; 11; 9; 8; 5; 1	A1.A0.NODE_3851_length_2967_cov_1118.826236_g2098_i0.p1	A0A0M3JRE8	SCP domain-containing protein	27	27	27	57.1	57.1	46.712	413	323.31	6290700000
3	A1.A4.NODE_11261_length_1863_cov_718.736553_g5582_i0.p1; A1.A1.NODE_15608_length_1589_cov_396.321288_g6322_i1.p1; A2.A0.S3314195.p1	406; 163; 367	32; 12; 5	A1.A4.NODE_11261_length_1863_cov_718.736553_g5582_i0.p1	A0A0B2V8D3	Aspartate aminotransferase	32	32	32	87.9	87.9	45.852	406	323.31	4750500000
17	A1.A5.NODE_8086_length_2423_cov_2862.261345_g1062_i1.p1; A2.A1.R3298755.p1; A1.A3.NODE_1204_length_2103_cov_2307.580039_g946_i0.p1; A1.A4.NODE_8669_length_2248_cov_2669.069325_g2757_i1.p1; A1.A6.NODE_4486_length_2554_cov_834.340594_g2403_i1.p1; A1.A0.NODE_10323_length_1643_cov_3060.382872_g5611_i0.p1; A1.A6.NODE_3929_length_2719_cov_760.469517_g2403_i0.p3; A1.A4.NODE_8669_length_2248_cov_2669.069…	436; 472; 268; 326; 251; 278; 196; 199; 105; 110; 174; 198; 462; 104; 120; 156; 112	34; 34; 24; 22; 21; 17; 12; 10; 9; 9; 9; 8; 7; 6; 6; 6; 4	A1.A5.NODE_8086_length_2423_cov_2862.261345_g1062_i1.p1	Q8MU59	2-phospho-D-glycerate hydro-lyase	34	34	34	81.9	81.9	47.473	436	323.31	2981000000
6	A1.A0.NODE_5951_length_2381_cov_8770.899828_g1026_i5.p1; A1.A0.NODE_4812_length_2660_cov_7580.517083_g1026_i3.p1; A1.A0.NODE_3278_length_3186_cov_6248.370808_g1026_i1.p1; A1.A0.NODE_4967_length_2621_cov_7632.246687_g1026_i4.p1; A1.A0.NODE_4769_length_2671_cov_5612.702982_g1026_i2.p1; A1.A0.NODE_1852_length_3941_cov_4916.934380_g1026_i0.p1	274; 246; 201; 238; 143; 184	30; 28; 22; 22; 17; 14	A1.A0.NODE_5951_length_2381_cov_8770.899828_g1026_i5.p1	E0VKL6	Metalloendopeptidase	30	30	30	85.4	85.4	31.319	274	323.31	10861000000
11	A1.A0.NODE_5277_length_2540_cov_112.492153_g2842_i0.p1; A1.A0.NODE_16586_length_955_cov_101.693333_g9436_i0.p1; A1.A4.NODE_122_length_7112_cov_83.813746_g57_i0.p1; A1.A4.NODE_1612_length_4390_cov_78.736491_g57_i2.p1; A1.A3.NODE_4932_length_1136_cov_24.493225_g3948_i0.p2; A1.A1.NODE_3789_length_3569_cov_15.281553_g1977_i0.p2; A1.A6.NODE_4666_length_2511_cov_9.060032_g1672_i2.p2; A1.A3.NODE_4932_le…	756; 236; 769; 816; 127; 165; 174; 197; 332; 517; 661	42; 9; 2; 2; 1; 1; 1; 1; 1; 1; 1	A1.A0.NODE_5277_length_2540_cov_112.492153_g2842_i0.p1	KHN77448.1	Neprilysin-1	42	42	24	65.2	34.7	86.331	756	323.31	3319700000
23	A1.A1.NODE_3284_length_3768_cov_8678.882734_g739_i2.p1; A1.A6.NODE_1336_length_4147_cov_2136.832929_g387_i2.p1; A1.A6.NODE_1213_length_4289_cov_2053.726291_g387_i1.p1; A1.A5.NODE_5446_length_2892_cov_7723.053703_g272_i8.p1; A1.A6.NODE_591_length_5331_cov_1599.782346_g387_i0.p1; A1.A4.NODE_567_length_5526_cov_3105.103008_g321_i0.p1; A1.A4.NODE_1682_length_4342_cov_4203.157870_g321_i2.p1; A1.A4.NOD…	652; 592; 535; 467; 517; 438; 378; 321; 411; 252; 241; 309; 275; 314; 194; 110; 635; 128; 108; 106; 108; 150; 150	41; 37; 35; 29; 29; 25; 21; 19; 18; 16; 15; 15; 14; 14; 11; 8; 7; 6; 4; 3; 2; 1; 1	A1.A1.NODE_3284_length_3768_cov_8678.882734_g739_i2.p1	A0A0M3IZF7	Phosphoenolpyruvate carboxykinase (GTP)	41	41	37	81.9	75.2	72.925	652	323.31	3526700000
24	A1.A5.NODE_1197_length_4774_cov_8712.987740_g615_i0.p2; A1.A4.NODE_7750_length_2405_cov_21196.086717_g3969_i0.p1; A1.A0.NODE_11949_length_1435_cov_15.795652_g6553_i0.p1; A1.A1.NODE_14468_length_1706_cov_45757.633313_g3609_i12.p1; A1.A4.NODE_12297_length_1730_cov_31233.403197_g3969_i6.p1; A1.A4.NODE_10299_length_1998_cov_38538.243229_g3969_i2.p1; A1.A4.NODE_10466_length_1975_cov_38995.914168_g3969…	360; 376; 384; 396; 376; 337; 353; 325; 376; 294; 273; 297; 335; 206; 191; 206; 220; 250; 191; 182; 190; 250; 115; 221	28; 28; 28; 28; 26; 24; 24; 20; 20; 18; 17; 17; 17; 14; 13; 13; 13; 13; 11; 9; 9; 9; 8; 6	A1.A5.NODE_1197_length_4774_cov_8712.987740_g615_i0.p2	P30163	Actin-2	28	28	7	85.3	30	40.212	360	323.31	2558000000
13	A1.A1.NODE_13609_length_1799_cov_223.287529_g3790_i1.p1; A1.A4.NODE_9603_length_2106_cov_99.494431_g4812_i0.p1; A1.A0.NODE_8875_length_1850_cov_206.781616_g4781_i0.p1; A1.A1.NODE_7766_length_2583_cov_126.369237_g3790_i0.p1; A1.A6.NODE_4473_length_2559_cov_24.721344_g2714_i0.p1; A1.A5.NODE_9233_length_2274_cov_47.012102_g4261_i0.p1; A2.A2.J743505.p1; A1.A0.NODE_8875_length_1850_cov_206.781616_g478…	474; 440; 298; 237; 242; 251; 259; 168; 190; 197; 124; 100; 153	34; 29; 21; 19; 19; 19; 19; 10; 9; 8; 4; 3; 2	A1.A1.NODE_13609_length_1799_cov_223.287529_g3790_i1.p1	A0A0M3JV41	M20_dimer domain-containing protein	34	34	34	76.4	76.4	53.347	474	323.31	1916800000
2	A1.A1.NODE_5508_length_3039_cov_233.168910_g2808_i0.p1; A2.A0.J3558515.p1	665; 102	34; 8	A1.A1.NODE_5508_length_3039_cov_233.168910_g2808_i0.p1	A0A0M3I5S5	Leuk-A4-hydro_C domain-containing protein	34	34	34	57.7	57.7	74.117	665	323.31	993920000
1	A1.A2.NODE_147_length_3193_cov_132.623262_g118_i0.p1	939	34	A1.A2.NODE_147_length_3193_cov_132.623262_g118_i0.p1	VDK19092	unnamed protein product [Anisakis simplex]	34	34	3	46.6	3.2	103.54	939	323.31	1119800000
23	A2.A2.R681573.p1; A2.A4.R2367151.p1; A1.A5.NODE_7346_length_2540_cov_3820.652783_g3470_i0.p1; A1.A4.NODE_12939_length_1650_cov_6431.440646_g2007_i6.p1; A1.A4.NODE_3641_length_3407_cov_4641.656566_g2007_i0.p1; A1.A4.NODE_4871_length_3040_cov_4549.728243_g2007_i1.p1; A1.A5.NODE_12503_length_1893_cov_4416.363784_g3470_i4.p1; A1.A4.NODE_18213_length_1076_cov_6493.077295_g8781_i0.p1; A1.A0.NODE_6041_l…	530; 538; 500; 428; 447; 458; 432; 239; 384; 171; 185; 185; 249; 105; 494; 199; 542; 151; 223; 124; 180; 186; 104	31; 31; 27; 24; 24; 24; 17; 15; 15; 14; 14; 13; 9; 7; 6; 5; 5; 4; 4; 3; 3; 2; 1	A2.A2.R681573.p1	F1L1D2	Glutamate dehydrogenase (NAD(P)(+))	31	27	24	61.9	56.6	58.702	530	323.31	2177500000
12	A1.A6.NODE_202_length_6934_cov_17.952498_g148_i0.p1; A1.A1.NODE_7_length_13980_cov_41.653274_g6_i0.p2; A1.A4.NODE_5234_length_2948_cov_9.309942_g860_i2.p1; A1.A4.NODE_1483_length_4482_cov_22.698942_g860_i0.p1; A1.A4.NODE_1483_length_4482_cov_22.698942_g860_i0.p2; A1.A4.NODE_14250_length_1493_cov_24.886364_g860_i3.p1; A1.A5.NODE_11179_length_2034_cov_58.557509_g1130_i2.p1; A1.A1.NODE_7_length_1398…	2219; 1236; 798; 893; 435; 285; 357; 251; 304; 232; 103; 2186	36; 14; 10; 10; 9; 7; 7; 6; 5; 2; 1; 1	A1.A6.NODE_202_length_6934_cov_17.952498_g148_i0.p1	A0A158PN74	Carboxypeptidase	36	35	35	26.4	26.4	250.9	2219	323.31	647280000
17	A1.A0.NODE_125_length_8606_cov_929.997661_g62_i0.p1; A1.A5.NODE_80_length_8196_cov_344.577701_g46_i0.p1; A1.A0.NODE_131_length_8462_cov_950.778042_g62_i1.p1; A1.A0.NODE_143_length_8241_cov_976.323846_g62_i6.p1; A1.A6.NODE_68_length_8795_cov_208.105635_g54_i0.p1; A1.A1.NODE_183_length_8095_cov_735.686971_g111_i0.p1; A1.A0.NODE_137_length_8366_cov_962.959692_g62_i4.p1; A1.A0.NODE_137_length_8366_co…	2399; 2463; 2151; 2107; 2021; 2084; 1223; 1195; 1436; 302; 279; 181; 158; 126; 110; 126; 138	50; 49; 41; 40; 34; 34; 28; 22; 22; 10; 9; 6; 5; 3; 2; 2; 2	A1.A0.NODE_125_length_8606_cov_929.997661_g62_i0.p1	ABL77410.1	UA3-recognized allergen	50	46	34	21.3	16.3	271.89	2399	323.31	481240000
1	A1.A1.NODE_1104_length_5326_cov_148.335045_g596_i0.p1	1539	28	A1.A1.NODE_1104_length_5326_cov_148.335045_g596_i0.p1	A0A0M3HN51	Pyrroline-5-carboxylate reductase	28	28	4	30.1	5.9	175.55	1539	323.31	392800000
14	A2.A0.R3469287.p1; A1.A3.NODE_8_length_7387_cov_289.497554_g6_i0.p1; A1.A0.NODE_51_length_11127_cov_777.288927_g27_i0.p1; A1.A2.NODE_8_length_6841_cov_424.243688_g4_i0.p1; A1.A0.NODE_51_length_11127_cov_777.288927_g27_i0.p2; A1.A1.NODE_2837_length_3975_cov_2268.610798_g31_i6.p1; A1.A1.NODE_2837_length_3975_cov_2268.610798_g31_i6.p2; A1.A2.NODE_8_length_6841_cov_424.243688_g4_i0.p2; A1.A4.NODE_128…	3841; 2263; 2019; 1153; 1640; 757; 367; 889; 248; 465; 137; 112; 122; 114	51; 32; 25; 20; 20; 11; 9; 8; 6; 5; 4; 3; 2; 1	A2.A0.R3469287.p1	BAT62430.1	Ani s 14 allergen	51	51	29	16.3	9.8	433.69	3841	323.31	514740000
6	A1.A5.NODE_8076_length_2425_cov_1931.363560_g3768_i0.p1; A1.A0.NODE_8235_length_1949_cov_1084.966209_g4426_i0.p1; A1.A6.NODE_6914_length_2049_cov_906.997525_g4033_i0.p4; A1.A0.NODE_23082_length_542_cov_3.876797_g14815_i0.p1; A1.A4.NODE_7900_length_2379_cov_2051.322070_g4041_i0.p3; A1.A0.NODE_8235_length_1949_cov_1084.966209_g4426_i0.p4	277; 209; 117; 180; 109; 109	21; 15; 6; 6; 2; 2	A1.A5.NODE_8076_length_2425_cov_1931.363560_g3768_i0.p1	A0A183V9L8	Galectin	21	21	19	69	64.6	31.838	277	321.98	1997900000
9	A2.A1.R3298920.p1; A1.A4.NODE_4509_length_3143_cov_3316.061896_g1260_i2.p1; A1.A1.NODE_3296_length_3764_cov_2068.296457_g1729_i0.p1; A1.A4.NODE_2205_length_4031_cov_2552.151880_g1260_i0.p1; A1.A0.NODE_7117_length_2147_cov_5.570268_g3814_i0.p1; A1.A1.NODE_3296_length_3764_cov_2068.296457_g1729_i0.p4; A1.A5.NODE_1843_length_4230_cov_1295.027944_g947_i0.p5; A1.A5.NODE_1843_length_4230_cov_1295.02794…	751; 776; 459; 395; 645; 129; 144; 156; 147	27; 26; 19; 10; 9; 5; 5; 5; 1	A2.A1.R3298920.p1	F1KWB3	Methylmalonyl-CoA mutase	27	27	7	48.3	12	83.056	751	321.43	1004500000
5	A2.A0.R3472101.p1; A1.A0.NODE_5718_length_2437_cov_201.273300_g3064_i0.p1; A1.A0.NODE_6462_length_2272_cov_235.195309_g3064_i1.p2; A1.A1.NODE_15334_length_1617_cov_10.121290_g7043_i0.p1; A1.A0.NODE_6462_length_2272_cov_235.195309_g3064_i1.p1	447; 400; 176; 482; 190	16; 11; 6; 4; 3	A2.A0.R3472101.p1	KHN86974.1	Endochitinase 1	16	16	16	63.8	63.8	49.876	447	320.38	327090000
5	A1.A4.NODE_2257_length_4001_cov_239.766667_g1292_i0.p2; A1.A4.NODE_15812_length_1320_cov_295.713057_g1292_i1.p1; A1.A5.NODE_10048_length_2166_cov_79.871879_g4585_i0.p1; A1.A5.NODE_10048_length_2166_cov_79.871879_g4585_i0.p2; A1.A0.NODE_9679_length_1732_cov_4.179487_g5245_i0.p1	476; 303; 309; 185; 462	26; 15; 14; 10; 1	A1.A4.NODE_2257_length_4001_cov_239.766667_g1292_i0.p2	A0A0M3K9E5	M20_dimer domain-containing protein	26	26	26	74.2	74.2	53.57	476	308.34	1023600000
7	A2.A1.R3298805.p1; A1.A1.NODE_8004_length_2538_cov_2554.384864_g3426_i1.p1; A1.A4.NODE_18214_length_1076_cov_1027.046377_g8628_i2.p1; A1.A1.NODE_6898_length_2733_cov_2185.490248_g3426_i0.p2; A1.A1.NODE_9741_length_2273_cov_2828.577516_g3426_i2.p2; A1.A1.NODE_6898_length_2733_cov_2185.490248_g3426_i0.p1; A1.A1.NODE_16166_length_1532_cov_944.562457_g3426_i4.p1	400; 327; 123; 109; 115; 216; 399	11; 9; 4; 3; 3; 2; 2	A2.A1.R3298805.p1	KHN88410.1	Aspartic protease 6	11	11	11	43	43	44.185	400	307.46	5013400000
8	A2.A1.R3299214.p1; A1.A5.NODE_9369_length_2255_cov_1755.856691_g2381_i2.p1; A1.A1.NODE_6677_length_2780_cov_1168.326944_g3328_i0.p1; A1.A1.NODE_8177_length_2508_cov_1250.233511_g3328_i1.p1; A1.A3.NODE_2571_length_1585_cov_1325.160026_g2047_i0.p1; A1.A6.NODE_9544_length_1640_cov_1069.109249_g5464_i0.p1; A1.A1.NODE_11863_length_2001_cov_1145.033609_g3328_i6.p1; A1.A1.NODE_33909_length_432_cov_1518.…	376; 383; 303; 253; 200; 257; 216; 126	27; 23; 20; 17; 16; 15; 10; 5	A2.A1.R3299214.p1	AJB44651.1	actin 2	27	12	7	45.5	29	42.194	376	306.58	2623700000
7	A1.A6.NODE_6872_length_2056_cov_85.955106_g3790_i1.p1; A1.A5.NODE_6689_length_2653_cov_66.063602_g3204_i0.p1; A1.A6.NODE_11736_length_1363_cov_80.526237_g3790_i2.p1; A1.A6.NODE_6459_length_2132_cov_20.699001_g3790_i0.p1; A1.A5.NODE_6689_length_2653_cov_66.063602_g3204_i0.p2; A2.A0.J3848782.p1; A1.A0.NODE_11394_length_1502_cov_7.099516_g6237_i0.p1	473; 309; 168; 118; 124; 103; 460	17; 11; 8; 4; 4; 2; 1	A1.A6.NODE_6872_length_2056_cov_85.955106_g3790_i1.p1	A0A0M3JSE0	M20_dimer domain-containing protein	17	17	17	59.6	59.6	53.53	473	274.69	764110000
7	A2.A1.R3301782.p1; A1.A5.NODE_7491_length_2516_cov_357.661140_g3534_i0.p2; A1.A6.NODE_13544_length_1163_cov_146.425044_g2852_i3.p1; A1.A5.NODE_7491_length_2516_cov_357.661140_g3534_i0.p1; A1.A6.NODE_15782_length_941_cov_163.879386_g2852_i4.p1; A2.A6.S999589.p1; A1.A6.NODE_12785_length_1246_cov_79.576007_g2852_i2.p1	699; 309; 245; 395; 203; 142; 226	30; 17; 13; 12; 11; 5; 2	A2.A1.R3301782.p1	A0A0M3IZU8	Phosphoenolpyruvate carboxykinase (GTP)	30	26	26	50.6	50.6	78.39	699	270.44	660400000
8	A1.A1.NODE_5647_length_3007_cov_811.256463_g2644_i1.p1; A1.A1.NODE_5799_length_2972_cov_752.708778_g2644_i2.p1; A1.A6.NODE_5598_length_2296_cov_22.838553_g2608_i1.p1; A1.A5.NODE_1771_length_4280_cov_89.986075_g906_i0.p3; A1.A4.NODE_14722_length_1441_cov_40.576429_g3268_i1.p1; A1.A1.NODE_20298_length_1167_cov_539.521818_g2644_i6.p1; A1.A1.NODE_5163_length_3133_cov_490.821918_g2644_i0.p1; A1.A5.NOD…	809; 679; 632; 166; 166; 258; 176; 305	21; 16; 12; 8; 8; 7; 5; 5	A1.A1.NODE_5647_length_3007_cov_811.256463_g2644_i1.p1	KHN80505.1	Neprilysin-2	21	21	14	35.2	26	91.517	809	270.33	870510000
6	A1.A6.NODE_5885_length_2243_cov_168.260163_g3498_i0.p1; A1.A4.NODE_9775_length_2075_cov_604.511799_g4893_i0.p1; A1.A1.NODE_5011_length_3174_cov_644.861925_g2319_i1.p1; A1.A5.NODE_7210_length_2562_cov_391.241763_g3411_i0.p1; A1.A1.NODE_4489_length_3334_cov_584.003673_g2319_i0.p3; A1.A4.NODE_10256_length_2005_cov_285.671589_g4893_i1.p1	351; 384; 403; 294; 130; 136	17; 17; 17; 11; 6; 1	A1.A6.NODE_5885_length_2243_cov_168.260163_g3498_i0.p1	A0A0M3JYW9	Fructose-bisphosphate aldolase	17	17	17	75.8	75.8	38.367	351	269.72	823190000
11	A2.A0.R3468997.p1; A1.A1.NODE_6010_length_2924_cov_10592.893595_g480_i2.p1; A1.A1.NODE_11782_length_2010_cov_8761.434380_g480_i6.p1; A1.A5.NODE_3251_length_3544_cov_2779.920023_g1623_i0.p2; A1.A6.NODE_3232_length_2964_cov_1321.510733_g1618_i1.p2; A1.A1.NODE_10868_length_2125_cov_11084.406706_g480_i4.p1; A1.A4.NODE_3788_length_3363_cov_2116.775135_g1914_i1.p2; A1.A6.NODE_2634_length_3250_cov_1184.…	360; 263; 144; 155; 160; 158; 104; 218; 340; 104; 111	16; 10; 8; 8; 8; 7; 6; 6; 6; 4; 4	A2.A0.R3468997.p1	A0A0M3K2Y3	Glyceraldehyde-3-phosphate dehydrogenase	16	16	16	54.2	54.2	38.476	360	269.32	1516200000
6	A2.A0.R3470192.p1; A1.A1.NODE_5823_length_2966_cov_555.879269_g2944_i0.p1; A1.A4.NODE_4461_length_3156_cov_579.368539_g2417_i0.p1; A1.A4.NODE_4461_length_3156_cov_579.368539_g2417_i0.p2; A1.A1.NODE_6198_length_2877_cov_611.127046_g2944_i1.p2	575; 445; 269; 262; 118; 557	25; 22; 15; 6; 2; 1	A2.A0.R3470192.p1	F1KUW6	Glucose-6-phosphate isomerase	25	25	25	56.5	56.5	64.266	575	266.55	1115000000
6	A1.A1.NODE_11178_length_2087_cov_925.947030_g4474_i1.p1; A1.A5.NODE_17056_length_1493_cov_1584.404828_g7206_i1.p1; A1.A5.NODE_19122_length_1342_cov_1787.802156_g7206_i2.p1; A1.A5.NODE_16798_length_1513_cov_1145.284354_g7206_i0.p1; A1.A4.NODE_17713_length_1126_cov_1084.004608_g8522_i0.p1; A1.A6.NODE_18923_length_696_cov_470.778111_g7550_i3.p1	318; 277; 227; 160; 203; 145	23; 21; 18; 14; 9; 6	A1.A1.NODE_11178_length_2087_cov_925.947030_g4474_i1.p1	A0A183V6K6	Galectin	23	23	23	59.4	59.4	36.051	318	260.56	3133900000
13	A1.A3.NODE_414_length_2999_cov_3393.041077_g313_i0.p1; A1.A1.NODE_5557_length_3027_cov_5958.766554_g506_i4.p1; A1.A4.NODE_862_length_5108_cov_2018.382870_g498_i0.p1; A1.A6.NODE_1889_length_3678_cov_961.232392_g608_i1.p1; A1.A5.NODE_844_length_5275_cov_2445.156346_g446_i0.p1; A1.A4.NODE_6624_length_2611_cov_3908.996887_g498_i1.p1; A1.A1.NODE_12135_length_1968_cov_2368.361915_g506_i8.p1; A1.A4.NODE…	737; 747; 555; 574; 512; 456; 356; 302; 742; 188; 237; 102; 115	26; 25; 22; 22; 20; 18; 11; 8; 8; 3; 3; 2; 2	A1.A3.NODE_414_length_2999_cov_3393.041077_g313_i0.p1	F1KUZ6	Propanoyl-CoA:carbon dioxide ligase subunit alpha	26	26	26	50.1	50.1	81.794	737	240.01	716820000
11	A1.A1.NODE_161_length_8331_cov_437.580954_g95_i0.p1; A1.A4.NODE_2_length_12731_cov_251.010481_g1_i0.p1; A1.A5.NODE_536_length_5850_cov_106.565180_g284_i0.p1; A1.A1.NODE_635_length_6159_cov_436.065332_g95_i1.p1; A1.A6.NODE_1981_length_3619_cov_127.315599_g350_i3.p2; A1.A6.NODE_1981_length_3619_cov_127.315599_g350_i3.p1; A2.A4.J2389665.p1; A1.A1.NODE_635_length_6159_cov_436.065332_g95_i1.p3; A1.A5.…	1499; 1571; 1080; 532; 386; 606; 649; 318; 363; 103; 436	24; 24; 17; 15; 11; 8; 6; 5; 5; 4; 2	A1.A1.NODE_161_length_8331_cov_437.580954_g95_i0.p1	KHN83973.1	Contactin-associated protein-like 5	24	24	24	20.8	20.8	167.85	1499	237.47	223930000
13	A2.A3.R787548.p1; A1.A0.NODE_1802_length_3981_cov_390.798268_g995_i0.p1; A1.A5.NODE_9970_length_2176_cov_521.342710_g2150_i2.p1; A1.A4.NODE_2145_length_4062_cov_556.905994_g596_i2.p1; A1.A4.NODE_2024_length_4139_cov_560.783309_g596_i1.p1; A1.A5.NODE_4382_length_3167_cov_674.867157_g2150_i0.p1; A1.A1.NODE_13715_length_1788_cov_843.094712_g6372_i0.p1; A1.A4.NODE_1037_length_4894_cov_452.512673_g596…	1007; 720; 610; 618; 580; 598; 453; 340; 244; 136; 156; 139; 173	24; 21; 17; 17; 16; 16; 12; 9; 7; 3; 3; 2; 1	A2.A3.R787548.p1	AHY24647.1	glycogen phosphorylase	24	24	24	34.9	34.9	115.34	1007	229.61	418350000
5	A1.A4.NODE_13248_length_1611_cov_3028.930573_g6480_i0.p1; A1.A6.NODE_5043_length_2412_cov_576.923626_g3021_i0.p1; A1.A5.NODE_17162_length_1486_cov_2508.674983_g7349_i0.p1; A1.A0.NODE_14359_length_1168_cov_691.294699_g8015_i0.p1; A1.A0.NODE_20589_length_668_cov_3.916803_g12504_i0.p1	406; 321; 332; 141; 222	15; 14; 14; 7; 2	A1.A4.NODE_13248_length_1611_cov_3028.930573_g6480_i0.p1	A0A0B2V0K0	Malate dehydrogenase	15	15	15	54.2	54.2	43.469	406	225.19	717950000
7	A2.A6.J985592.p1; A1.A0.NODE_724_length_5298_cov_37.303261_g409_i0.p1; A1.A5.NODE_834_length_5285_cov_139.950591_g443_i0.p2; A1.A5.NODE_834_length_5285_cov_139.950591_g443_i0.p1; A1.A5.NODE_9848_length_2192_cov_174.677990_g443_i4.p1; A2.A0.J3613853.p1; A2.A5.J3326802.p1	1519; 1559; 794; 810; 351; 152; 158	30; 29; 15; 14; 4; 3; 1	A2.A6.J985592.p1	XP_020306366.1	A-macroglobulin complement component family protein	30	30	30	33.8	33.8	168.21	1519	223.17	457620000
4	A1.A4.NODE_7998_length_2361_cov_2289.971121_g4093_i0.p1; A1.A6.NODE_6045_length_2214_cov_841.189931_g3248_i2.p1; A1.A4.NODE_15400_length_1364_cov_3001.311413_g4093_i6.p1; A1.A1.NODE_1226_length_5173_cov_792.361731_g658_i0.p3	278; 259; 306; 146	20; 18; 18; 8	A1.A4.NODE_7998_length_2361_cov_2289.971121_g4093_i0.p1	A0A0B2V9X0	Galectin	20	18	9	63.3	39.2	31.416	278	221.17	1165800000
1	A1.A5.NODE_14298_length_1718_cov_85.789254_g6270_i1.p1	435	10	A1.A5.NODE_14298_length_1718_cov_85.789254_g6270_i1.p1	KHN74210.1	Aspartic protease 6	10	10	7	32.6	17.2	47.792	435	213.61	1814600000
2	A1.A0.NODE_8586_length_1894_cov_4103.976618_g4616_i0.p1; A1.A0.NODE_12404_length_1383_cov_5219.945783_g4616_i1.p1	168; 169	12; 12	A1.A0.NODE_8586_length_1894_cov_4103.976618_g4616_i0.p1	A0A0M3K1U4	SCP domain-containing protein	12	12	3	70.2	17.3	18.723	168	204.28	495320000
4	A1.A1.NODE_5148_length_3137_cov_1402.231922_g982_i4.p1; A1.A4.NODE_7612_length_2431_cov_1267.555230_g3900_i0.p1; A1.A4.NODE_7612_length_2431_cov_1267.555230_g3900_i0.p2; A1.A1.NODE_6020_length_2922_cov_452.154816_g982_i6.p1	582; 330; 106; 115	23; 11; 3; 3	A1.A1.NODE_5148_length_3137_cov_1402.231922_g982_i4.p1	APP18139.1	phosphoglucomutase 1	23	23	23	57	57	63.277	582	197.15	957600000
7	A1.A1.NODE_1991_length_4436_cov_1016.466926_g916_i3.p1; A1.A1.NODE_1951_length_4465_cov_1054.579809_g916_i2.p1; A1.A0.NODE_2904_length_3358_cov_1126.626097_g1541_i1.p1; A1.A0.NODE_2904_length_3358_cov_1126.626097_g1541_i1.p2; A1.A0.NODE_9979_length_1693_cov_4.470085_g5410_i0.p1; A1.A5.NODE_1574_length_4428_cov_763.935234_g802_i0.p1; A1.A4.NODE_3012_length_3654_cov_1008.519236_g1698_i0.p1	423; 444; 241; 194; 442; 103; 128	11; 11; 7; 3; 3; 2; 2	A1.A1.NODE_1991_length_4436_cov_1016.466926_g916_i3.p1	A0A0M3JZR1	Rab GDP dissociation inhibitor	11	11	11	39.7	39.7	47.817	423	195.07	127400000
12	A1.A1.NODE_126_length_8670_cov_372.706498_g83_i0.p1; A1.A1.NODE_142_length_8492_cov_402.081780_g83_i1.p1; A1.A5.NODE_327_length_6529_cov_131.375116_g88_i2.p1; A1.A0.NODE_130_length_8481_cov_190.809518_g63_i0.p1; A1.A6.NODE_604_length_5296_cov_185.371938_g88_i1.p2; A1.A4.NODE_44_length_8356_cov_245.111726_g19_i0.p1; A1.A4.NODE_287_length_6178_cov_111.932377_g19_i1.p2; A2.A3.J800457.p1; A1.A5.NODE_…	2121; 2215; 978; 1618; 408; 1159; 625; 236; 290; 304; 489; 1027	20; 20; 17; 6; 3; 3; 2; 1; 1; 1; 1; 1	A1.A1.NODE_126_length_8670_cov_372.706498_g83_i0.p1	KHN81382.1	Filamin-A	20	20	4	17.2	3.3	230.59	2121	194.53	148510000
11	A1.A0.NODE_2445_length_3591_cov_161.470023_g1326_i0.p1; A1.A0.NODE_2766_length_3426_cov_165.241471_g1326_i3.p1; A1.A6.NODE_2145_length_3520_cov_85.703237_g631_i1.p1; A1.A5.NODE_3656_length_3404_cov_207.063374_g879_i1.p2; A1.A4.NODE_16432_length_1259_cov_391.091954_g361_i3.p1; A1.A0.NODE_2718_length_3453_cov_165.266922_g1326_i2.p1; A1.A6.NODE_948_length_4616_cov_66.069544_g631_i0.p2; A1.A5.NODE_36…	741; 411; 717; 269; 321; 411; 269; 288; 128; 177; 364	7; 5; 5; 4; 3; 3; 2; 2; 1; 1; 1	A1.A0.NODE_2445_length_3591_cov_161.470023_g1326_i0.p1	????	NA	7	7	7	17.1	17.1	80.146	741	193.8	150230000
1	A1.A5.NODE_19201_length_1338_cov_42.535907_g8147_i0.p1	366	19	A1.A5.NODE_19201_length_1338_cov_42.535907_g8147_i0.p1	A0A0M3KCN6	P-type domain-containing protein	19	13	4	38.5	14.5	41.517	366	189.55	1892200000
10	A1.A5.NODE_3929_length_3305_cov_134.077866_g1936_i0.p1; A1.A6.NODE_12558_length_1272_cov_151.411907_g6995_i0.p1; A1.A0.NODE_13796_length_1229_cov_133.800681_g7678_i0.p1; A1.A4.NODE_17620_length_1135_cov_236.376600_g6945_i2.p2; A1.A4.NODE_17620_length_1135_cov_236.376600_g6945_i2.p1; A1.A1.NODE_21172_length_1095_cov_206.216926_g9674_i0.p1; A1.A0.NODE_24720_length_482_cov_155.941452_g16428_i0.p1; A…	286; 154; 121; 122; 130; 155; 126; 179; 108; 100	14; 7; 5; 5; 5; 5; 3; 3; 2; 1	A1.A5.NODE_3929_length_3305_cov_134.077866_g1936_i0.p1	A0A0B2VZB1	S-methyl-5'-thioadenosine phosphorylase	14	14	14	70.6	70.6	31.868	286	188.64	394040000
24	A1.A0.NODE_2342_length_3642_cov_47.976582_g1277_i0.p1; A1.A6.NODE_2910_length_3113_cov_39.391051_g1769_i0.p1; A1.A6.NODE_8610_length_1768_cov_54.972973_g1769_i5.p1; A1.A6.NODE_4738_length_2493_cov_60.475649_g1769_i3.p1; A1.A1.NODE_11398_length_2060_cov_124.078274_g5361_i0.p1; A1.A1.NODE_16380_length_1511_cov_143.915512_g7481_i0.p1; A1.A1.NODE_11734_length_2016_cov_111.869164_g5501_i0.p1; A1.A1.NO…	1057; 915; 335; 338; 511; 395; 484; 543; 227; 537; 152; 307; 573; 118; 287; 289; 112; 113; 121; 165; 194; 196; 220; 274	22; 15; 11; 11; 9; 7; 7; 7; 6; 6; 5; 5; 4; 2; 2; 2; 1; 1; 1; 1; 1; 1; 1; 1	A1.A0.NODE_2342_length_3642_cov_47.976582_g1277_i0.p1	KHN74592.1	putative serine protease K12H4.7	22	22	3	34.5	5.2	120.5	1057	182.51	286810000
12	A2.A1.R3299343.p1; A1.A1.NODE_11747_length_2014_cov_1228.103236_g1482_i5.p1; A1.A6.NODE_10590_length_1503_cov_291.709634_g5993_i0.p1; A1.A0.NODE_13145_length_1303_cov_619.589744_g7269_i0.p1; A1.A4.NODE_16842_length_1218_cov_648.548853_g2729_i3.p1; A1.A1.NODE_17074_length_1444_cov_873.472041_g1482_i14.p1; A1.A4.NODE_5120_length_2974_cov_331.119673_g2729_i0.p2; A1.A1.NODE_10581_length_2164_cov_571.…	322; 248; 338; 192; 248; 190; 121; 319; 121; 152; 170; 211	15; 12; 11; 8; 8; 6; 5; 5; 3; 3; 2; 2	A2.A1.R3299343.p1	A0A0M3HZY4	Annexin	15	15	15	63.4	63.4	36.728	322	178.38	352600000
7	A1.A4.NODE_7844_length_2387_cov_5955.845695_g2560_i2.p1; A1.A3.NODE_1418_length_1985_cov_2748.244888_g1123_i0.p1; A1.A6.NODE_2935_length_3101_cov_1794.385417_g1665_i1.p1; A1.A6.NODE_2724_length_3202_cov_1727.434920_g1665_i0.p1; A1.A0.NODE_16980_length_920_cov_23.321387_g9707_i0.p1; A1.A1.NODE_28385_length_625_cov_12025.775986_g14724_i0.p1; A1.A1.NODE_35756_length_393_cov_1.380368_g21946_i0.p1	251; 222; 147; 129; 251; 107; 130	15; 14; 9; 7; 7; 5; 1	A1.A4.NODE_7844_length_2387_cov_5955.845695_g2560_i2.p1	AHJ11170.1	14-3-3 zeta	15	15	15	52.2	52.2	28.551	251	172.64	198270000
2	A1.A1.NODE_801_length_5851_cov_43.626729_g458_i0.p1; A1.A6.NODE_10281_length_1545_cov_6.253958_g5840_i0.p1	1871; 405	22; 6	A1.A1.NODE_801_length_5851_cov_43.626729_g458_i0.p1	A0A0M3K7E1	Aminopeptidase	22	22	5	14.4	2.7	215.86	1871	170.28	269820000
5	A1.A1.NODE_6996_length_2714_cov_1331.951266_g1756_i1.p1; A1.A0.NODE_17363_length_891_cov_879.345694_g9978_i0.p1; A1.A6.NODE_6641_length_2102_cov_519.741438_g3052_i2.p1; A1.A5.NODE_10773_length_2079_cov_1353.267682_g2510_i1.p1; A1.A4.NODE_11585_length_1823_cov_1282.472503_g4738_i5.p2	212; 185; 212; 163; 113	15; 14; 13; 11; 2	A1.A1.NODE_6996_length_2714_cov_1331.951266_g1756_i1.p1	A0A0M3K3V9	Galectin	15	15	3	78.8	20.8	24.398	212	170.04	1215700000
9	A1.A1.NODE_676_length_6074_cov_113.625104_g380_i1.p1; A1.A0.NODE_416_length_6214_cov_31.900471_g218_i0.p2; A1.A4.NODE_1617_length_4385_cov_41.687155_g931_i0.p1; A1.A0.NODE_416_length_6214_cov_31.900471_g218_i0.p1; A1.A4.NODE_1617_length_4385_cov_41.687155_g931_i0.p2; A2.A6.R1038287.p1; A1.A5.NODE_33468_length_614_cov_10.768827_g267_i3.p1; A1.A1.NODE_15289_length_1621_cov_203.432432_g380_i6.p1; A1…	1892; 830; 822; 1028; 488; 211; 183; 257; 257	24; 15; 11; 9; 5; 2; 1; 1; 1	A1.A1.NODE_676_length_6074_cov_113.625104_g380_i1.p1	A0A3P6MYV4	Peptidase_M1 domain-containing protein	24	24	24	19.2	19.2	217.13	1892	168.15	249840000
1	A1.A5.NODE_18612_length_1377_cov_545.856072_g7911_i0.p1	402	16	A1.A5.NODE_18612_length_1377_cov_545.856072_g7911_i0.p1	A0A3P7GMX7	SERPIN domain-containing protein	16	16	9	40.3	23.4	45.696	402	166.32	1425700000
4	A1.A5.NODE_10499_length_2112_cov_1827.258096_g4760_i0.p1; A1.A4.NODE_5804_length_2798_cov_1728.624592_g3073_i0.p1; A1.A5.NODE_10499_length_2112_cov_1827.258096_g4760_i0.p2; A1.A0.NODE_10156_length_1666_cov_8.518932_g5511_i0.p1	498; 499; 102; 478	16; 16; 3; 3	A1.A5.NODE_10499_length_2112_cov_1827.258096_g4760_i0.p1	A0A2R4KRP1	Dihydrolipoyl dehydrogenase	16	16	16	46.4	46.4	52.876	498	165.87	296950000
6	A1.A6.NODE_308_length_6345_cov_26.091039_g212_i0.p1; A1.A1.NODE_459_length_6717_cov_207.399248_g256_i0.p1; A1.A1.NODE_797_length_5853_cov_234.371068_g256_i2.p1; A1.A1.NODE_797_length_5853_cov_234.371068_g256_i2.p2; A1.A1.NODE_459_length_6717_cov_207.399248_g256_i0.p2; A1.A1.NODE_4524_length_3324_cov_278.078293_g256_i3.p2	1705; 1561; 1014; 596; 354; 154	21; 16; 11; 9; 4; 3	A1.A6.NODE_308_length_6345_cov_26.091039_g212_i0.p1	KHN76517.1	Thyrotropin-releasing hormone-degrading ectoenzyme	21	21	19	17.1	14.8	197.16	1705	165.11	178290000
17	A1.A3.NODE_510_length_2823_cov_2294.676450_g385_i0.p1; A1.A6.NODE_2742_length_3195_cov_1905.122868_g1242_i1.p1; A1.A5.NODE_2973_length_3662_cov_3860.568942_g1493_i0.p1; A1.A4.NODE_3351_length_3518_cov_3979.286166_g1873_i0.p1; A2.A0.R3485109.p1; A1.A1.NODE_6234_length_2869_cov_7694.124554_g3025_i2.p1; A1.A4.NODE_9895_length_2057_cov_5053.060516_g1873_i3.p2; A1.A1.NODE_6982_length_2717_cov_7461.135…	579; 718; 319; 458; 599; 365; 123; 285; 301; 122; 242; 116; 156; 165; 183; 401; 732	13; 13; 10; 10; 6; 5; 3; 3; 3; 2; 2; 1; 1; 1; 1; 1; 1	A1.A3.NODE_510_length_2823_cov_2294.676450_g385_i0.p1	AIU38242.1	heat shock protein 90	13	13	13	27.6	27.6	67.633	579	162.18	160070000
2	A1.A4.NODE_8751_length_2236_cov_131.266515_g4444_i0.p1; A1.A0.NODE_13160_length_1301_cov_431.760032_g3922_i1.p1	390; 328	11; 7	A1.A4.NODE_8751_length_2236_cov_131.266515_g4444_i0.p1	PAV80752.1	hypothetical protein WR25_03339 isoform A [Diploscapter pachys]	11	11	11	50.8	50.8	44.415	390	158.89	760600000
9	A1.A6.NODE_556_length_5418_cov_35.446094_g355_i1.p1; A1.A5.NODE_689_length_5500_cov_76.538574_g367_i0.p1; A1.A4.NODE_577_length_5512_cov_51.931640_g327_i0.p1; A1.A4.NODE_577_length_5512_cov_51.931640_g327_i0.p2; A1.A5.NODE_689_length_5500_cov_76.538574_g367_i0.p2; A2.A0.J3836427.p2; A2.A0.J3836427.p1; A2.A0.J3870225.p1; A2.A0.J3870225.p2	1487; 986; 770; 553; 472; 376; 376; 167; 157	21; 13; 9; 7; 6; 5; 5; 3; 1	A1.A6.NODE_556_length_5418_cov_35.446094_g355_i1.p1	APP18135.1	glycogen-debranching enzyme	21	21	21	26.2	26.2	168.28	1487	155.2	152200000
6	A2.A0.R3470537.p1; A1.A0.NODE_4277_length_2817_cov_313.887400_g1841_i2.p1; A1.A0.NODE_3509_length_3089_cov_291.058668_g1841_i1.p1; A1.A0.NODE_3385_length_3140_cov_283.907942_g1841_i0.p1; A1.A0.NODE_3385_length_3140_cov_283.907942_g1841_i0.p3; A1.A0.NODE_3509_length_3089_cov_291.058668_g1841_i1.p2	566; 570; 373; 435; 130; 203	16; 15; 12; 12; 4; 3	A2.A0.R3470537.p1	A0A0B2VFI3	Carboxylic ester hydrolase	16	16	16	47.2	47.2	63.034	566	154.91	301830000
3	A1.A5.NODE_10316_length_2134_cov_51.817312_g4691_i0.p1; A1.A4.NODE_763_length_5233_cov_98.299499_g441_i0.p1; A1.A4.NODE_18726_length_1029_cov_28.614372_g441_i3.p1	523; 523; 201	15; 15; 3	A1.A5.NODE_10316_length_2134_cov_51.817312_g4691_i0.p1	A0A0M3HZ12	CYTOSOL_AP domain-containing protein	15	15	15	40.7	40.7	57.039	523	153.42	125470000
5	A1.A0.NODE_5868_length_2399_cov_1597.349403_g2699_i2.p1; A1.A1.NODE_11538_length_2041_cov_2444.340932_g1861_i1.p1; A1.A0.NODE_4991_length_2615_cov_1415.235938_g2699_i0.p2; A1.A5.NODE_6882_length_2618_cov_915.768155_g3285_i0.p2; A2.A0.R3501162.p1	247; 229; 181; 140; 239	17; 15; 12; 8; 5	A1.A0.NODE_5868_length_2399_cov_1597.349403_g2699_i2.p1	A0A3P6RU49	PPIase cyclophilin-type domain-containing protein	17	17	17	85.8	85.8	27.138	247	152.13	642170000
9	A2.A0.R3469403.p1; A1.A4.NODE_2242_length_4009_cov_746.307964_g1054_i1.p1; A1.A6.NODE_7903_length_1877_cov_541.347403_g4579_i0.p1; A1.A1.NODE_10707_length_2147_cov_1752.461538_g5069_i0.p1; A1.A5.NODE_7566_length_2504_cov_780.144657_g3565_i0.p1; A1.A4.NODE_1820_length_4260_cov_617.990756_g1054_i0.p3; A2.A5.R3299026.p2; A1.A6.NODE_7903_length_1877_cov_541.347403_g4579_i0.p3; A2.A0.S2413258.p1	432; 445; 236; 252; 220; 119; 184; 106; 204	14; 14; 7; 7; 5; 4; 4; 2; 1	A2.A0.R3469403.p1	A0A0M3K3R5	Phosphoglycerate kinase	14	14	14	54.9	54.9	46.93	432	134.24	351560000
5	A1.A0.NODE_9433_length_1767_cov_192.459112_g5101_i0.p1; A2.A2.R684680.p1; A1.A3.NODE_3058_length_1469_cov_57.424306_g2427_i0.p1; A1.A3.NODE_3058_length_1469_cov_57.424306_g2427_i0.p2; A2.A1.R3333151.p1	512; 496; 343; 208; 232	8; 7; 4; 2; 2	A1.A0.NODE_9433_length_1767_cov_192.459112_g5101_i0.p1	?????	NA	8	8	8	48.8	48.8	50.75	512	131.73	375020000
2	A1.A5.NODE_10196_length_2146_cov_828.899667_g4333_i1.p1; A1.A4.NODE_9878_length_2059_cov_190.280971_g4949_i0.p1	164; 119	7; 4	A1.A5.NODE_10196_length_2146_cov_828.899667_g4333_i1.p1	CAQ43040.1	surface associated antigen 1 precursor	7	7	7	45.7	45.7	17.682	164	129.3	180530000
17	A1.A5.NODE_6407_length_2697_cov_5923.926526_g2204_i2.p1; A1.A5.NODE_4501_length_3137_cov_4581.388171_g2204_i0.p1; A1.A5.NODE_5984_length_2776_cov_5691.034394_g2204_i1.p1; A1.A0.NODE_8023_length_1982_cov_4650.320187_g3797_i1.p1; A1.A1.NODE_5117_length_3149_cov_8619.538287_g2037_i2.p1; A1.A0.NODE_7086_length_2151_cov_4343.418893_g3797_i0.p1; A1.A0.NODE_8682_length_1880_cov_4932.103562_g3797_i2.p1; …	536; 455; 363; 381; 443; 282; 318; 183; 263; 167; 187; 187; 548; 99; 143; 155; 155	7; 6; 5; 5; 5; 4; 4; 3; 3; 2; 2; 2; 2; 1; 1; 1; 1	A1.A5.NODE_6407_length_2697_cov_5923.926526_g2204_i2.p1	KHN75145.1	Propionyl-CoA carboxylase beta chain, mitochondrial	7	7	7	19.2	19.2	58.456	536	124.51	153880000
2	A1.A3.NODE_1177_length_2115_cov_244.641419_g923_i0.p1; A1.A1.NODE_12054_length_1977_cov_209.311518_g5253_i1.p1	431; 303	10; 7	A1.A3.NODE_1177_length_2115_cov_244.641419_g923_i0.p1	F1KYH3	Ornithine--oxo-acid aminotransferase	10	10	10	40.6	40.6	47.579	431	123.86	208160000
3	A1.A4.NODE_334_length_6029_cov_277.934202_g183_i0.p1; A1.A4.NODE_521_length_5603_cov_237.804926_g183_i1.p4; A1.A4.NODE_521_length_5603_cov_237.804926_g183_i1.p3	494; 146; 151	15; 4; 4	A1.A4.NODE_334_length_6029_cov_277.934202_g183_i0.p1	KHN77544.1	putative serine protease F56F10.1	15	15	3	39.3	7.9	55.879	494	122.8	473810000
1	A2.A0.R3480563.p1	558	12	A2.A0.R3480563.p1	A0A183UDC5	Glucuronosyltransferase	12	12	12	26.5	26.5	64.274	558	120.58	324200000
4	A1.A0.NODE_6022_length_2363_cov_218.765598_g3215_i0.p1; A1.A4.NODE_945_length_5003_cov_1177.483474_g548_i0.p1; A2.A0.S253414.p1; A1.A4.NODE_945_length_5003_cov_1177.483474_g548_i0.p2	624; 946; 104; 205	13; 11; 2; 1	A1.A0.NODE_6022_length_2363_cov_218.765598_g3215_i0.p1	AXS78305.1	Phosphoglucomutase-2	13	13	13	35.1	35.1	70.447	624	117.5	250780000
8	A1.A1.NODE_14542_length_1698_cov_283.343348_g6274_i1.p1; A1.A6.NODE_8776_length_1745_cov_146.863054_g5054_i0.p1; A1.A3.NODE_2154_length_1704_cov_500.584478_g1718_i0.p1; A1.A1.NODE_13476_length_1812_cov_256.778223_g6274_i0.p2; A1.A1.NODE_13476_length_1812_cov_256.778223_g6274_i0.p1; A2.A6.S1007830.p1; A1.A5.NODE_25896_length_928_cov_220.475706_g6086_i2.p1; A2.A5.R3302804.p1	481; 447; 310; 173; 327; 112; 157; 102	15; 14; 10; 7; 7; 4; 3; 2	A1.A1.NODE_14542_length_1698_cov_283.343348_g6274_i1.p1	KHN85135.1	Xaa-Pro dipeptidase	15	15	15	50.7	50.7	54.602	481	116.86	188620000
11	A1.A5.NODE_4630_length_3106_cov_34.155077_g2261_i0.p1; A1.A4.NODE_605_length_5455_cov_101.238271_g342_i0.p1; A1.A6.NODE_488_length_5670_cov_82.167523_g322_i0.p1; A1.A3.NODE_4118_length_1265_cov_49.591424_g3292_i0.p1; A1.A1.NODE_3847_length_3547_cov_39.640517_g2003_i0.p1; A2.A4.J2445064.p1; A1.A6.NODE_2741_length_3196_cov_21.243448_g322_i2.p1; A1.A6.NODE_2741_length_3196_cov_21.243448_g322_i2.p5; …	392; 392; 393; 353; 144; 159; 231; 100; 160; 103; 103	11; 11; 11; 7; 5; 5; 5; 4; 4; 1; 1	A1.A5.NODE_4630_length_3106_cov_34.155077_g2261_i0.p1	KHN88413.1	Aspartic protease 6	11	11	11	40.3	40.3	43.637	392	113.57	455700000
7	A1.A0.NODE_2883_length_3372_cov_58.385288_g1430_i1.p1; A1.A5.NODE_6226_length_2733_cov_181.754647_g3013_i0.p1; A1.A0.NODE_2646_length_3492_cov_56.862380_g1430_i0.p1; A1.A1.NODE_5944_length_2937_cov_247.731359_g2566_i1.p1; A1.A4.NODE_5516_length_2874_cov_68.291211_g2927_i0.p2; A1.A4.NODE_5516_length_2874_cov_68.291211_g2927_i0.p1; A2.A0.J3769049.p1	526; 657; 421; 252; 209; 222; 111	8; 8; 6; 5; 3; 2; 1	A1.A0.NODE_2883_length_3372_cov_58.385288_g1430_i1.p1	KHN87594.1	Breast cancer anti-estrogen resistance protein 1	8	8	8	22.6	22.6	58.926	526	109.89	157840000
7	A2.A1.R3302803.p1; A1.A0.NODE_3917_length_2944_cov_81.931810_g2134_i0.p1; A1.A1.NODE_19372_length_1245_cov_307.960102_g3989_i5.p1; A1.A5.NODE_6921_length_2613_cov_79.173930_g3291_i0.p1; A2.A4.J2414606.p1; A1.A0.NODE_3917_length_2944_cov_81.931810_g2134_i0.p2; A1.A5.NODE_6921_length_2613_cov_79.173930_g3291_i0.p2	564; 478; 209; 435; 205; 154; 127	15; 10; 8; 8; 5; 4; 2	A2.A1.R3302803.p1	A0A0B2VHA2	Carboxylic ester hydrolase	15	15	15	32.8	32.8	63.702	564	108.81	496410000
6	A1.A5.NODE_1893_length_4196_cov_95.290392_g752_i1.p2; A1.A1.NODE_1864_length_4548_cov_127.246150_g1017_i0.p2; A1.A1.NODE_2740_length_4026_cov_135.270523_g1017_i1.p2; A1.A4.NODE_2101_length_4090_cov_100.255866_g1214_i0.p2; A1.A5.NODE_1466_length_4518_cov_83.542570_g752_i0.p2; A1.A1.NODE_5992_length_2928_cov_145.751136_g1017_i3.p1	289; 291; 183; 133; 192; 194	10; 10; 8; 6; 5; 5	A1.A5.NODE_1893_length_4196_cov_95.290392_g752_i1.p2	A0A0M3JWG7	2-deoxy-D-ribose 5-phosphate aldolase	10	10	10	43.9	43.9	32.121	289	106.99	289970000
6	A2.A0.R3469554.p1; A1.A0.NODE_9296_length_1786_cov_1062.006932_g5029_i0.p1; A1.A0.NODE_9890_length_1702_cov_1128.106254_g5029_i1.p1; A1.A0.NODE_9890_length_1702_cov_1128.106254_g5029_i1.p2; A2.A1.J3342100.p1; A1.A0.NODE_9296_length_1786_cov_1062.006932_g5029_i0.p2	396; 259; 201; 164; 177; 131	7; 5; 4; 3; 2; 1	A2.A0.R3469554.p1	KHN83866.1	Aspartic protease 3	7	7	7	27.3	27.3	44.008	396	105.93	319840000
4	A1.A0.NODE_16366_length_974_cov_1922.262242_g9290_i0.p1; A1.A1.NODE_19751_length_1213_cov_2166.821990_g3993_i2.p2; A2.A1.R3323914.p1; A1.A5.NODE_32395_length_650_cov_34.996705_g15319_i0.p1	105; 116; 123; 123	7; 7; 1; 1	A1.A0.NODE_16366_length_974_cov_1922.262242_g9290_i0.p1	CDP92575.1	Bm1201	7	7	7	76.2	76.2	12.187	105	105.31	1537400000
2	A1.A6.NODE_7552_length_1935_cov_732.225079_g3262_i1.p1; A2.A1.R3299113.p1	386; 141	13; 7	A1.A6.NODE_7552_length_1935_cov_732.225079_g3262_i1.p1	F1L4G8	S-(hydroxymethyl)glutathione dehydrogenase	13	13	5	43.8	14.8	41.964	386	100.07	388630000
3	A1.A4.NODE_16569_length_1245_cov_170.377907_g7972_i0.p1; A1.A4.NODE_17143_length_1188_cov_206.037489_g7972_i1.p1; A2.A6.J989382.p1	222; 272; 189	6; 6; 3	A1.A4.NODE_16569_length_1245_cov_170.377907_g7972_i0.p1	????	NA	6	6	6	41.4	41.4	21.368	222	98.262	29893000
19	A1.A0.NODE_4591_length_2719_cov_1157.031532_g2102_i1.p1; A2.A1.R3299774.p1; A1.A0.NODE_5977_length_2374_cov_1328.601121_g2102_i5.p1; A1.A0.NODE_5297_length_2534_cov_1241.377975_g2102_i4.p1; A1.A0.NODE_4666_length_2699_cov_1149.755673_g2102_i2.p2; A1.A5.NODE_6644_length_2661_cov_539.195569_g2478_i1.p2; A1.A5.NODE_5072_length_2990_cov_516.133017_g2478_i0.p1; A1.A1.NODE_3664_length_3610_cov_603.6257…	665; 701; 540; 504; 309; 350; 395; 350; 368; 418; 101; 139; 211; 274; 107; 248; 282; 99; 165	11; 9; 8; 7; 6; 6; 6; 5; 5; 5; 3; 3; 3; 3; 2; 2; 2; 1; 1	A1.A0.NODE_4591_length_2719_cov_1157.031532_g2102_i1.p1	XP_033471168.1	LOW QUALITY PROTEIN: uncharacterized protein LOC107108246	11	11	11	20.8	20.8	75.635	665	97.128	155500000
22	A1.A4.NODE_4356_length_3184_cov_28551.227808_g2014_i1.p1; A1.A2.NODE_701_length_1968_cov_8078.480660_g568_i0.p1; A1.A4.NODE_3653_length_3402_cov_12452.254984_g2014_i0.p1; A1.A4.NODE_11178_length_1876_cov_23844.053406_g2014_i4.p1; A1.A6.NODE_7232_length_1990_cov_6904.278939_g2607_i2.p1; A1.A0.NODE_14113_length_1192_cov_10095.070361_g7607_i2.p1; A1.A4.NODE_14727_length_1440_cov_19487.681201_g2014_i…	411; 336; 296; 273; 301; 221; 233; 273; 184; 281; 183; 187; 188; 116; 120; 129; 148; 150; 165; 101; 134; 183	13; 11; 9; 8; 8; 7; 7; 7; 6; 6; 5; 5; 5; 4; 4; 4; 4; 4; 4; 3; 3; 1	A1.A4.NODE_4356_length_3184_cov_28551.227808_g2014_i1.p1	KHN73958.1	Acetyl-CoA acetyltransferase A, mitochondrial	13	13	13	56.9	56.9	43.307	411	94.638	209580000
3	A2.A4.R2374661.p1; A1.A5.NODE_3537_length_3443_cov_120.690294_g1683_i1.p1; A1.A5.NODE_22256_length_1138_cov_93.585388_g1683_i3.p1	683; 754; 299	12; 11; 2	A2.A4.R2374661.p1	APP18136.1	1,4-alpha-glucan branching enzyme	12	12	12	34.8	34.8	78.767	683	94.379	100380000
9	A1.A6.NODE_9123_length_1696_cov_7.204559_g5247_i0.p1; A1.A5.NODE_19824_length_1295_cov_22.292332_g8038_i1.p1; A1.A4.NODE_11703_length_1808_cov_10.550085_g5783_i0.p1; A2.A4.R2400531.p1; A1.A1.NODE_14922_length_1658_cov_11.737901_g6875_i0.p1; A1.A5.NODE_18926_length_1356_cov_15.919269_g8038_i0.p1; A1.A5.NODE_26620_length_894_cov_19.708578_g8038_i5.p2; A1.A5.NODE_19824_length_1295_cov_22.292332_g803…	467; 292; 369; 390; 488; 149; 121; 150; 165	7; 5; 5; 5; 4; 2; 1; 1; 1	A1.A6.NODE_9123_length_1696_cov_7.204559_g5247_i0.p1	A0A0M3K4H9	Metallophos domain-containing protein	7	7	6	26.8	24.6	53.662	467	94.159	167980000
2	A1.A6.NODE_9454_length_1653_cov_53.512931_g3244_i1.p1; A2.A6.S996861.p1	266; 119	6; 2	A1.A6.NODE_9454_length_1653_cov_53.512931_g3244_i1.p1	CDP95231.1	Bm9716	6	6	6	32.3	32.3	29.264	266	93.121	414040000
15	A1.A0.NODE_5881_length_2396_cov_290.149936_g3110_i1.p1; A1.A4.NODE_12376_length_1721_cov_721.397619_g2913_i3.p1; A2.A1.R3299278.p1; A1.A2.NODE_141_length_3220_cov_544.735506_g113_i0.p1; A1.A1.NODE_9759_length_2272_cov_373.019955_g367_i6.p1; A1.A5.NODE_21561_length_1181_cov_313.589631_g1463_i5.p1; A1.A1.NODE_14387_length_1715_cov_490.836165_g367_i7.p1; A1.A1.NODE_657_length_6112_cov_748.520430_g36…	432; 445; 564; 573; 203; 205; 206; 230; 237; 243; 205; 279; 306; 307; 117	12; 12; 12; 12; 6; 6; 6; 6; 6; 6; 5; 5; 5; 5; 3	A1.A0.NODE_5881_length_2396_cov_290.149936_g3110_i1.p1	A0A0M3K1X5	Moesin/ezrin/radixin homolog 1	12	12	12	34.3	34.3	51.492	432	90.454	146280000
6	A1.A1.NODE_14062_length_1748_cov_4341.837002_g5565_i2.p1; A1.A0.NODE_6159_length_2334_cov_2365.840720_g3296_i0.p1; A1.A5.NODE_8165_length_2413_cov_580.278481_g3814_i0.p1; A1.A1.NODE_12909_length_1874_cov_3247.719978_g6016_i0.p1; A1.A0.NODE_8185_length_1957_cov_2021.008938_g3296_i1.p1; A1.A0.NODE_13358_length_1280_cov_16.571429_g7396_i0.p1	344; 364; 112; 127; 132; 366	8; 8; 1; 1; 1; 1	A1.A1.NODE_14062_length_1748_cov_4341.837002_g5565_i2.p1	A0A0M3K444	Fructose-bisphosphate aldolase	8	8	8	41.9	41.9	38.166	344	88.138	103010000
8	A2.A4.R2376689.p1; A1.A1.NODE_9058_length_2379_cov_215.658304_g3782_i2.p2; A1.A4.NODE_4431_length_3163_cov_72.131326_g2400_i0.p1; A1.A5.NODE_17117_length_1489_cov_95.654910_g6364_i2.p1; A1.A1.NODE_9058_length_2379_cov_215.658304_g3782_i2.p1; A1.A4.NODE_4431_length_3163_cov_72.131326_g2400_i0.p2; A1.A1.NODE_12759_length_1892_cov_41.422466_g5956_i0.p1; A2.A0.J3648561.p1	539; 252; 252; 306; 325; 206; 111; 111	12; 6; 6; 6; 6; 5; 3; 2	A2.A4.R2376689.p1	KHN85115.1	putative aldehyde dehydrogenase family 7 member A1 -like protein	12	12	12	38	38	58.202	539	86.621	188090000
4	A1.A4.NODE_17834_length_1115_cov_1272.787709_g8584_i0.p1; A1.A1.NODE_18150_length_1345_cov_2086.517214_g8246_i0.p1; A1.A1.NODE_21776_length_1049_cov_2156.415479_g8246_i2.p1; A1.A5.NODE_17079_length_1492_cov_23.947550_g7311_i0.p1	206; 127; 130; 210	10; 7; 6; 1	A1.A4.NODE_17834_length_1115_cov_1272.787709_g8584_i0.p1	P46436	Glutathione S-transferase 1	10	10	10	60.7	60.7	23.622	206	86.134	1090100000
12	A1.A4.NODE_1595_length_4400_cov_279.952971_g332_i1.p1; A1.A1.NODE_7464_length_2633_cov_539.969602_g1326_i4.p1; A2.A4.R2369862.p1; A1.A1.NODE_2489_length_4151_cov_410.773751_g1326_i0.p1; A1.A5.NODE_3436_length_3481_cov_386.734729_g1708_i0.p1; A1.A0.NODE_7151_length_2138_cov_274.385982_g2002_i2.p1; A1.A4.NODE_583_length_5504_cov_218.166209_g332_i0.p1; A1.A5.NODE_8652_length_2348_cov_482.265944_g170…	566; 548; 584; 679; 562; 348; 326; 326; 154; 318; 164; 137	12; 11; 11; 11; 10; 7; 6; 5; 4; 4; 3; 1	A1.A4.NODE_1595_length_4400_cov_279.952971_g332_i1.p1	F1KYW3	Sulfhydryl oxidase	12	12	12	28.6	28.6	64.657	566	84.056	227380000
19	A1.A6.NODE_4131_length_2659_cov_4018.119011_g2509_i0.p1; A1.A5.NODE_10760_length_2080_cov_4810.115857_g4855_i0.p1; A1.A5.NODE_27439_length_853_cov_7710.924691_g12085_i0.p1; A1.A1.NODE_38169_length_352_cov_1.245614_g24358_i0.p1; A1.A6.NODE_15514_length_967_cov_4721.991471_g2509_i2.p1; A1.A0.NODE_18229_length_821_cov_3273.227154_g8729_i19.p1; A1.A4.NODE_10651_length_1950_cov_8721.110529_g3584_i5.p2…	649; 316; 111; 117; 167; 186; 200; 239; 262; 461; 163; 238; 102; 106; 113; 129; 129; 186; 188	11; 5; 3; 3; 3; 3; 3; 3; 3; 3; 2; 2; 1; 1; 1; 1; 1; 1; 1	A1.A6.NODE_4131_length_2659_cov_4018.119011_g2509_i0.p1	AIU38247.1	heat shock protein 70	11	11	4	18	7.2	70.656	649	83.309	125680000
7	A1.A1.NODE_13369_length_1824_cov_1307.305635_g6224_i0.p1; A1.A0.NODE_12250_length_1401_cov_1958.313522_g3031_i2.p1; A1.A0.NODE_12507_length_1370_cov_1926.583270_g3031_i3.p1; A1.A0.NODE_5663_length_2451_cov_1195.741653_g3031_i0.p1; A1.A0.NODE_12772_length_1341_cov_1647.384914_g3031_i4.p1; A1.A6.NODE_2954_length_3090_cov_161.198301_g1802_i0.p1; A1.A4.NODE_12663_length_1686_cov_178.872948_g6244_i0.p1	190; 109; 120; 194; 151; 165; 165	9; 8; 8; 8; 3; 2; 2	A1.A1.NODE_13369_length_1824_cov_1307.305635_g6224_i0.p1	Q7Z1K3	Major allergen Ani s 1	9	9	9	44.2	44.2	21.073	190	82.828	165280000
8	A1.A6.NODE_12874_length_1236_cov_872.653687_g4957_i2.p1; A1.A5.NODE_23510_length_1062_cov_1764.536801_g10033_i0.p1; A1.A1.NODE_15573_length_1593_cov_1653.355177_g7148_i0.p1; A1.A6.NODE_14159_length_1099_cov_765.785047_g4957_i4.p1; A1.A1.NODE_21251_length_1089_cov_2307.619374_g9717_i0.p1; A1.A6.NODE_8601_length_1769_cov_569.110920_g4957_i0.p1; A1.A1.NODE_39567_length_333_cov_1.597744_g25754_i0.p1;…	195; 229; 130; 164; 170; 105; 110; 186	9; 9; 6; 6; 6; 3; 1; 1	A1.A6.NODE_12874_length_1236_cov_872.653687_g4957_i2.p1	Q9NL98	Peroxiredoxin	9	9	9	70.3	70.3	21.744	195	81.397	509020000
3	A1.A1.NODE_3398_length_3720_cov_201.145086_g1771_i0.p1; A1.A5.NODE_2403_length_3924_cov_124.875290_g1218_i0.p1; A1.A5.NODE_2403_length_3924_cov_124.875290_g1218_i0.p2	908; 759; 176	11; 6; 3	A1.A1.NODE_3398_length_3720_cov_201.145086_g1771_i0.p1	KHN79862.1	Cytosolic 10-formyltetrahydrofolate dehydrogenase	11	11	11	21	21	100.25	908	81.058	170590000
1	A1.A5.NODE_7668_length_2489_cov_131.247751_g3608_i0.p1	488	11	A1.A5.NODE_7668_length_2489_cov_131.247751_g3608_i0.p1	A0A0M3JVZ6	6-phosphogluconate dehydrogenase, decarboxylating	11	11	11	47.5	47.5	53.709	488	80.357	113440000
1	A1.A4.NODE_11758_length_1802_cov_21.095968_g5815_i0.p1	267	9	A1.A4.NODE_11758_length_1802_cov_21.095968_g5815_i0.p1	A0A0B2URF5	Glucosamine-6-phosphate isomerase	9	9	9	43.4	43.4	29.865	267	79.124	102750000
13	A1.A4.NODE_5326_length_2919_cov_713.685893_g1652_i1.p1; A1.A0.NODE_4772_length_2670_cov_567.977438_g2587_i0.p1; A1.A6.NODE_3292_length_2942_cov_251.778579_g2018_i0.p1; A1.A1.NODE_6446_length_2829_cov_773.559377_g3230_i0.p1; A1.A4.NODE_2930_length_3686_cov_521.211797_g1652_i0.p1; A1.A1.NODE_11731_length_2016_cov_505.563879_g3230_i2.p1; A1.A5.NODE_2520_length_3865_cov_456.484563_g1285_i0.p1; A1.A4.…	614; 522; 445; 459; 265; 292; 218; 117; 130; 130; 134; 203; 119	10; 8; 6; 6; 4; 4; 3; 2; 2; 2; 2; 2; 1	A1.A4.NODE_5326_length_2919_cov_713.685893_g1652_i1.p1	A0A0M3HQ02	Uncharacterized protein	10	10	10	24.8	24.8	67.217	614	79.107	64486000
11	A1.A4.NODE_5575_length_2861_cov_570.100709_g528_i5.p1; A1.A1.NODE_16902_length_1459_cov_1846.905891_g7693_i0.p1; A1.A0.NODE_16865_length_930_cov_1620.545143_g9631_i0.p1; A1.A4.NODE_22144_length_738_cov_1171.446198_g528_i14.p1; A1.A0.NODE_17586_length_873_cov_10.430318_g10148_i0.p1; A1.A1.NODE_14691_length_1682_cov_105.381424_g5997_i1.p4; A1.A1.NODE_32513_length_471_cov_1.180693_g18713_i0.p1; A1.A…	172; 169; 195; 152; 172; 105; 157; 165; 172; 194; 335	11; 10; 9; 5; 3; 1; 1; 1; 1; 1; 1	A1.A4.NODE_5575_length_2861_cov_570.100709_g528_i5.p1	A0A0B2VFK7	Peptidyl-prolyl cis-trans isomerase	11	11	7	79.1	66.3	18.57	172	77.789	487080000
1	A1.A1.NODE_5273_length_3101_cov_13.624588_g2693_i0.p1	941	10	A1.A1.NODE_5273_length_3101_cov_13.624588_g2693_i0.p1	KHN83246.1	IgGFc-binding protein	10	10	10	15.9	15.9	104.94	941	77.561	106990000
1	A1.A0.NODE_6589_length_2246_cov_113.469192_g3529_i0.p2	138	7	A1.A0.NODE_6589_length_2246_cov_113.469192_g3529_i0.p2	A0A0M3KCN6	P-type domain-containing protein	7	7	5	39.1	30.4	15.564	138	76.31	787860000
3	A1.A4.NODE_17679_length_1129_cov_703.719669_g8506_i0.p1; A1.A1.NODE_20232_length_1172_cov_936.152941_g7994_i2.p1; A1.A1.NODE_17570_length_1399_cov_758.966967_g7994_i0.p1	177; 118; 105	7; 4; 2	A1.A4.NODE_17679_length_1129_cov_703.719669_g8506_i0.p1	A0A0M3JAH0	Pepsin-I3 domain-containing protein	7	7	7	47.5	47.5	19.8	177	72.948	69521000
4	A1.A5.NODE_1728_length_4308_cov_79.478312_g883_i0.p1; A2.A0.R3478181.p1; A2.A1.J3303008.p1; A2.A0.J3506789.p2	1107; 1461; 366; 102	8; 8; 2; 1	A1.A5.NODE_1728_length_4308_cov_79.478312_g883_i0.p1	KHN83506.1	Cadherin-related hmr-1	8	8	8	13.1	13.1	120.18	1107	70.834	72562000
9	A1.A4.NODE_4386_length_3177_cov_39.262755_g2377_i0.p1; A1.A5.NODE_6244_length_2728_cov_301.398510_g3017_i0.p1; A2.A4.R2368318.p1; A1.A1.NODE_5571_length_3025_cov_58.424611_g2828_i1.p1; A1.A1.NODE_5571_length_3025_cov_58.424611_g2828_i1.p2; A1.A6.NODE_19815_length_638_cov_29.003284_g4586_i1.p1; A1.A0.NODE_14194_length_1185_cov_107.630973_g2836_i1.p1; A1.A1.NODE_5548_length_3029_cov_34.124240_g2828…	646; 455; 832; 364; 302; 111; 229; 148; 185	12; 10; 9; 6; 5; 3; 3; 2; 2	A1.A4.NODE_4386_length_3177_cov_39.262755_g2377_i0.p1	KHN81373.1	Phosphoenolpyruvate carboxykinase [GTP]	12	9	9	25.4	25.4	72.244	646	70.568	76266000
3	A1.A3.NODE_6264_length_974_cov_325.979894_g5024_i0.p1; A2.A2.J704442.p1; A1.A1.NODE_11507_length_2045_cov_383.620829_g1170_i9.p1	209; 130; 511	8; 5; 5	A1.A3.NODE_6264_length_974_cov_325.979894_g5024_i0.p1	A0A0M3KAL6	GST class-pi	8	8	8	47.4	47.4	24.391	209	69.961	379420000
7	A1.A0.NODE_5639_length_2455_cov_1250.826250_g734_i5.p1; A1.A1.NODE_27649_length_664_cov_30.777219_g9648_i2.p1; A1.A0.NODE_5550_length_2478_cov_1257.562113_g734_i4.p1; A1.A0.NODE_6531_length_2258_cov_905.411257_g734_i6.p1; A1.A0.NODE_2545_length_3540_cov_753.851076_g734_i3.p1; A1.A0.NODE_1308_length_4449_cov_718.193901_g734_i0.p1; A1.A0.NODE_1462_length_4268_cov_782.216235_g734_i1.p1	269; 190; 204; 322; 283; 156; 193	5; 4; 4; 4; 3; 1; 1	A1.A0.NODE_5639_length_2455_cov_1250.826250_g734_i5.p1	A0A3G5BC99	Metalloendopeptidase	5	5	5	24.2	24.2	30.162	269	65.68	113230000
2	A1.A4.NODE_6532_length_2631_cov_317.048649_g3390_i0.p1; A1.A1.NODE_14021_length_1752_cov_377.074777_g6502_i0.p1	352; 263	9; 8	A1.A4.NODE_6532_length_2631_cov_317.048649_g3390_i0.p1	A0A0M3KBA5	Malate dehydrogenase	9	9	9	30.7	30.7	37.075	352	60.407	94018000
5	A2.A4.R2371362.p1; A1.A1.NODE_9901_length_2251_cov_484.268315_g3601_i7.p1; A1.A4.NODE_3632_length_3411_cov_192.957270_g2001_i0.p2; A1.A4.NODE_3632_length_3411_cov_192.957270_g2001_i0.p1; A2.A0.S888971.p1	583; 596; 142; 170; 508	9; 9; 4; 2; 2	A2.A4.R2371362.p1	A0A0B2VUR0	Phosphoglycerate mutase (2,3-diphosphoglycerate-independent)	9	9	9	20.6	20.6	64.518	583	58.342	76195000
5	A1.A0.NODE_1502_length_4238_cov_118.734879_g834_i0.p1; A1.A5.NODE_14437_length_1706_cov_166.540589_g6326_i0.p1; A1.A4.NODE_2348_length_3953_cov_144.467536_g279_i3.p1; A1.A1.NODE_14080_length_1747_cov_86.497619_g6526_i0.p1; A1.A1.NODE_26727_length_712_cov_195.581395_g13306_i0.p1	348; 348; 248; 152; 180	4; 4; 3; 1; 1	A1.A0.NODE_1502_length_4238_cov_118.734879_g834_i0.p1	A0A0M3J0C8	Lipase_3 domain-containing protein	4	4	4	10.9	10.9	38.981	348	57.52	107030000
5	A1.A4.NODE_4832_length_3050_cov_464.525424_g817_i1.p1; A1.A5.NODE_4821_length_3053_cov_610.140864_g2338_i0.p1; A1.A0.NODE_5402_length_2511_cov_356.079805_g2906_i0.p1; A1.A5.NODE_8758_length_2334_cov_784.868616_g2338_i3.p1; A1.A6.NODE_4901_length_2451_cov_208.295211_g2933_i0.p1	275; 320; 266; 247; 144	6; 6; 4; 3; 1	A1.A4.NODE_4832_length_3050_cov_464.525424_g817_i1.p1	A0A0M3K7C2	Annexin	6	6	6	34.5	34.5	30.722	275	56.218	53522000
2	A1.A5.NODE_10913_length_2063_cov_198.110396_g4921_i0.p1; A1.A0.NODE_11200_length_1528_cov_132.449423_g6126_i0.p1	176; 158	5; 3	A1.A5.NODE_10913_length_2063_cov_198.110396_g4921_i0.p1	A0A0M3JY59	Ferritin	5	5	5	34.7	34.7	20.282	176	54.556	122240000
6	A1.A5.NODE_9223_length_2274_cov_260.308382_g3969_i1.p1; A1.A4.NODE_9448_length_2128_cov_284.052228_g3813_i1.p1; A1.A0.NODE_9085_length_1815_cov_203.077273_g4905_i0.p1; A1.A0.NODE_9104_length_1813_cov_200.191126_g4905_i1.p1; A1.A1.NODE_13798_length_1779_cov_733.814836_g6129_i1.p1; A1.A5.NODE_8539_length_2361_cov_205.178171_g3969_i0.p2	244; 292; 261; 139; 139; 100	8; 8; 7; 4; 4; 2	A1.A5.NODE_9223_length_2274_cov_260.308382_g3969_i1.p1	A0A0M3JY59	Chloride intracellular channel exc-4	8	8	8	48.4	48.4	28.728	244	52.135	55420000
1	A1.A5.NODE_22302_length_1135_cov_337.506410_g9469_i0.p1	235	7	A1.A5.NODE_22302_length_1135_cov_337.506410_g9469_i0.p1	A0A0M3IT87	SERPIN domain-containing protein	7	7	4	26.4	14.5	26.491	235	51.553	232890000
11	A1.A4.NODE_4767_length_3066_cov_5751.619174_g1514_i1.p1; A1.A1.NODE_4256_length_3406_cov_4678.473795_g1328_i1.p1; A1.A5.NODE_5166_length_2964_cov_4108.289627_g2527_i0.p1; A1.A4.NODE_8237_length_2320_cov_7283.233875_g1514_i3.p1; A1.A0.NODE_13859_length_1224_cov_36.980325_g7721_i0.p1; A1.A0.NODE_15658_length_1041_cov_8173.397566_g8810_i0.p1; A1.A0.NODE_14778_length_1126_cov_7484.745098_g8253_i0.p1;…	304; 263; 183; 198; 306; 168; 190; 103; 155; 298; 300	8; 6; 5; 5; 5; 4; 4; 3; 3; 3; 3	A1.A4.NODE_4767_length_3066_cov_5751.619174_g1514_i1.p1	A0A0B2V880	ADP/ATP translocase	8	8	8	26.6	26.6	33.647	304	50.488	83729000
7	A1.A4.NODE_326_length_6043_cov_340.434688_g178_i0.p1; A2.A1.R3300175.p1; A1.A1.NODE_1178_length_5218_cov_386.102699_g633_i0.p1; A1.A1.NODE_1178_length_5218_cov_386.102699_g633_i0.p2; A1.A6.NODE_2980_length_3076_cov_154.633738_g454_i2.p1; A1.A4.NODE_9985_length_2045_cov_229.972555_g178_i4.p1; A1.A4.NODE_6776_length_2579_cov_319.046493_g178_i2.p1	1539; 1540; 1058; 307; 358; 123; 158	7; 6; 3; 2; 2; 1; 1	A1.A4.NODE_326_length_6043_cov_340.434688_g178_i0.p1	KHN84799.1	Ras GTPase-activating-like protein IQGAP1	7	7	7	7.5	7.5	178.44	1539	48.721	53029000
15	A1.A5.NODE_4290_length_3192_cov_4505.086059_g2106_i0.p1; A1.A1.NODE_6225_length_2871_cov_7050.422967_g2725_i1.p1; A1.A0.NODE_4914_length_2633_cov_2326.048875_g2619_i1.p1; A1.A0.NODE_4823_length_2657_cov_2281.902767_g2619_i0.p1; A1.A4.NODE_5818_length_2795_cov_3223.998548_g2430_i3.p1; A1.A6.NODE_2589_length_3277_cov_1315.467672_g1595_i0.p1; A1.A1.NODE_9833_length_2261_cov_9076.842753_g2725_i2.p1; …	684; 520; 520; 676; 423; 434; 445; 323; 117; 160; 275; 120; 172; 214; 253	7; 6; 6; 6; 4; 4; 4; 3; 2; 2; 2; 1; 1; 1; 1	A1.A5.NODE_4290_length_3192_cov_4505.086059_g2106_i0.p1	KHN80715.1	Elongation factor 2	7	7	5	18.1	14.3	76.352	684	48.481	88129000
8	A1.A5.NODE_3912_length_3308_cov_387.485452_g1930_i0.p1; A1.A6.NODE_1721_length_3805_cov_101.586864_g1095_i0.p1; A1.A4.NODE_1742_length_4309_cov_209.507966_g1008_i0.p1; A1.A1.NODE_7281_length_2665_cov_248.275212_g3597_i0.p1; A1.A5.NODE_8008_length_2438_cov_101.753653_g1930_i5.p1; A1.A4.NODE_6976_length_2542_cov_545.497801_g3605_i0.p2; A1.A5.NODE_1577_length_4426_cov_224.373032_g803_i0.p1; A1.A0.NO…	582; 359; 238; 442; 110; 163; 163; 362	7; 5; 4; 2; 1; 1; 1; 1	A1.A5.NODE_3912_length_3308_cov_387.485452_g1930_i0.p1	KHN86723.1	Protein F37C4.5	7	7	5	17	13.1	64.638	582	46.706	49782000
3	A2.A0.R3470766.p1; A1.A1.NODE_1243_length_5145_cov_478.976172_g38_i3.p1; A1.A1.NODE_17240_length_1428_cov_549.005143_g7839_i0.p1	200; 200; 200	5; 5; 4	A2.A0.R3470766.p1	A0A158PNG4	Isochorismatase domain-containing protein	5	5	5	42	42	22.017	200	46.61	31888000
3	A1.A1.NODE_17410_length_1414_cov_767.738679_g7918_i0.p1; A1.A5.NODE_11586_length_1991_cov_350.062115_g5189_i0.p1; A1.A4.NODE_13370_length_1596_cov_55.242444_g6529_i0.p1	368; 505; 118	5; 5; 1	A1.A1.NODE_17410_length_1414_cov_767.738679_g7918_i0.p1	A0A183V5N4	Carboxypeptidase	5	5	5	17.4	17.4	41.472	368	46.528	44645000
2	A1.A5.NODE_23899_length_1041_cov_47.210421_g9057_i1.p1; A1.A5.NODE_21380_length_1193_cov_41.244348_g9057_i0.p1	347; 232	17; 15	A1.A5.NODE_23899_length_1041_cov_47.210421_g9057_i1.p1	A0A0M3KCN6	P-type domain-containing protein	17	5	5	21.3	21.3	38.392	347	46.447	52488000
3	A1.A1.NODE_12698_length_1898_cov_274.527034_g3263_i1.p1; A1.A6.NODE_14917_length_1026_cov_49.733200_g6643_i1.p1; A1.A5.NODE_12286_length_1917_cov_209.712914_g5480_i0.p1	173; 131; 134	6; 2; 2	A1.A1.NODE_12698_length_1898_cov_274.527034_g3263_i1.p1	A0A0B2V1B9	TIL domain-containing protein	6	6	6	30.1	30.1	19.412	173	45.638	197670000
6	A2.A1.R3298654.p2; A2.A0.R3543372.p1; A1.A6.NODE_7101_length_2014_cov_1203.245340_g4142_i0.p1; A1.A4.NODE_6293_length_2690_cov_2266.485844_g3154_i1.p1; A1.A5.NODE_7834_length_2465_cov_2949.563997_g3369_i1.p1; A1.A0.NODE_13620_length_1249_cov_3540.882747_g7562_i0.p1	229; 153; 169; 183; 117; 165	4; 2; 2; 2; 1; 1	A2.A1.R3298654.p2	A0A158PMX4	Adenylate kinase isoenzyme 1	4	4	4	22.3	22.3	25.451	229	45.156	26969000
5	A1.A0.NODE_5218_length_2558_cov_68.053136_g2811_i0.p1; A1.A4.NODE_5710_length_2823_cov_244.868799_g3025_i0.p1; A1.A5.NODE_6151_length_2747_cov_282.818047_g2981_i0.p1; A1.A5.NODE_6151_length_2747_cov_282.818047_g2981_i0.p2; A1.A4.NODE_5710_length_2823_cov_244.868799_g3025_i0.p2	688; 463; 503; 160; 153	6; 4; 3; 2; 1	A1.A0.NODE_5218_length_2558_cov_68.053136_g2811_i0.p1	????	NA	6	6	6	13.8	13.8	76.98	688	44.178	60084000
1	A1.A4.NODE_6699_length_2594_cov_66.096357_g3464_i0.p1	652	6	A1.A4.NODE_6699_length_2594_cov_66.096357_g3464_i0.p1	KHN82623.1	ATP-binding cassette sub-family D member 4	6	6	6	10.3	10.3	75.478	652	42.519	42196000
1	A1.A6.NODE_16164_length_906_cov_676.942987_g3167_i2.p1	141	6	A1.A6.NODE_16164_length_906_cov_676.942987_g3167_i2.p1	A0A0M3KAU7	Galectin	6	6	6	57.4	57.4	16.393	141	42.186	327990000
3	A1.A6.NODE_3675_length_2806_cov_140.397911_g2259_i0.p1; A1.A5.NODE_10590_length_2101_cov_157.252187_g2285_i2.p1; A1.A0.NODE_8536_length_1901_cov_3.335861_g4587_i0.p1	615; 379; 584	5; 4; 4	A1.A6.NODE_3675_length_2806_cov_140.397911_g2259_i0.p1	A0A0M3JVS3	H(+)-transporting two-sector ATPase	5	5	5	9.8	9.8	67.96	615	41.539	34845000
3	A2.A1.R3299680.p1; A1.A0.NODE_10165_length_1665_cov_6.447826_g5515_i0.p1; A1.A4.NODE_10072_length_2031_cov_668.470854_g5040_i0.p2	436; 436; 122	5; 3; 1	A2.A1.R3299680.p1	A0A0B2URV3	Adenosylhomocysteinase	5	5	5	13.1	13.1	47.759	436	41.371	34371000
1	A1.A5.NODE_30114_length_737_cov_141.086455_g13716_i0.p1	121	4	A1.A5.NODE_30114_length_737_cov_141.086455_g13716_i0.p1	A0A0M3J349	DUF4440 domain-containing protein	4	4	3	31.4	31.4	13.586	121	39.535	53832000
13	A1.A1.NODE_14854_length_1664_cov_967.781465_g6344_i2.p1; A1.A4.NODE_7403_length_2467_cov_571.131080_g1710_i1.p1; A1.A4.NODE_3043_length_3640_cov_358.294526_g1710_i0.p1; A2.A5.R3301668.p1; A1.A4.NODE_9834_length_2066_cov_589.272593_g4925_i0.p1; A1.A4.NODE_8286_length_2312_cov_612.009247_g1710_i4.p1; A1.A6.NODE_11843_length_1352_cov_261.679516_g2684_i2.p1; A1.A4.NODE_13325_length_1600_cov_778.32520…	259; 270; 281; 147; 240; 243; 277; 320; 115; 157; 123; 162; 177	5; 4; 4; 3; 3; 3; 3; 3; 2; 2; 1; 1; 1	A1.A1.NODE_14854_length_1664_cov_967.781465_g6344_i2.p1	A0A0M3J349	Annexin	5	5	5	32.8	32.8	29.412	259	39.119	37836000
9	A2.A5.R3311060.p1; A1.A1.NODE_11652_length_2026_cov_112.701378_g5464_i0.p1; A1.A4.NODE_9823_length_2068_cov_24.765170_g4918_i0.p1; A2.A3.J848085.p1; A2.A4.J2434001.p1; A1.A5.NODE_17438_length_1463_cov_94.420423_g5207_i2.p1; A1.A1.NODE_11652_length_2026_cov_112.701378_g5464_i0.p2; A1.A4.NODE_9823_length_2068_cov_24.765170_g4918_i0.p2; A1.A5.NODE_24189_length_1024_cov_96.199796_g5207_i4.p1	520; 397; 342; 184; 218; 321; 131; 146; 169	6; 5; 4; 3; 3; 2; 1; 1; 1	A2.A5.R3311060.p1	A0A044S8N4	CYTOSOL_AP domain-containing protein	6	6	6	20.2	20.2	55.531	520	38.163	33866000
13	A1.A5.NODE_3613_length_3419_cov_614.974230_g1507_i2.p1; A1.A4.NODE_3765_length_3370_cov_402.665065_g2071_i0.p1; A1.A5.NODE_3408_length_3491_cov_589.648202_g1507_i1.p1; A1.A5.NODE_3008_length_3649_cov_549.773433_g1507_i0.p1; A1.A0.NODE_3334_length_3159_cov_393.834085_g1785_i1.p1; A1.A1.NODE_11127_length_2094_cov_1192.562407_g2315_i5.p4; A1.A4.NODE_7550_length_2443_cov_267.648210_g2071_i1.p2; A1.A6…	891; 938; 828; 382; 574; 118; 136; 140; 143; 146; 227; 343; 345	5; 5; 4; 2; 2; 1; 1; 1; 1; 1; 1; 1; 1	A1.A5.NODE_3613_length_3419_cov_614.974230_g1507_i2.p1	F1KRW4	C-1-tetrahydrofolate synthase, cytoplasmic	5	5	5	7.4	7.4	96.587	891	37.903	19436000
9	A2.A5.R3309285.p2; A1.A5.NODE_2224_length_4014_cov_99.480232_g1138_i0.p1; A2.A0.J3888598.p1; A1.A1.NODE_4379_length_3366_cov_218.687178_g2269_i0.p1; A1.A4.NODE_3336_length_3523_cov_111.346927_g1864_i0.p1; A1.A0.NODE_24689_length_484_cov_1.899767_g16397_i0.p1; A1.A1.NODE_4379_length_3366_cov_218.687178_g2269_i0.p3; A1.A5.NODE_9630_length_2221_cov_126.777319_g1138_i2.p1; A1.A1.NODE_4379_length_3366…	571; 610; 186; 273; 298; 120; 137; 141; 201	4; 4; 3; 2; 2; 1; 1; 1; 1	A2.A5.R3309285.p2	A0A0M3JRD3	Aldehyde dehydrogenase family 4 member A1	4	4	4	10.5	10.5	63.2	571	37.146	27825000
1	A2.A0.R3474669.p1	458	6	A2.A0.R3474669.p1	A0A0M3K6G9	Carboxypeptidase Q	6	6	6	19.9	19.9	51.332	458	36.701	54765000
9	A1.A0.NODE_292_length_6859_cov_367.546590_g144_i2.p1; A1.A0.NODE_282_length_6967_cov_368.899884_g144_i0.p1; A1.A1.NODE_1839_length_4573_cov_1160.091212_g999_i0.p1; A1.A6.NODE_1339_length_4143_cov_269.581429_g870_i0.p1; A1.A5.NODE_2062_length_4100_cov_642.125709_g896_i1.p1; A1.A4.NODE_3528_length_3445_cov_1218.839894_g1273_i1.p1; A1.A1.NODE_3711_length_3593_cov_1452.116279_g999_i3.p1; A1.A4.NODE_2…	566; 618; 629; 378; 378; 430; 195; 226; 519	5; 5; 5; 2; 2; 2; 1; 1; 1	A1.A0.NODE_292_length_6859_cov_367.546590_g144_i2.p1	KHN72363.1	Transketolase	5	5	5	14	14	61.073	566	36.23	47069000
5	A1.A5.NODE_1681_length_4341_cov_153.411354_g855_i0.p1; A1.A1.NODE_2506_length_4138_cov_315.456153_g1334_i0.p1; A1.A0.NODE_1910_length_3906_cov_45.430018_g1052_i0.p1; A2.A6.J1010439.p1; A2.A2.R691525.p1	829; 874; 934; 205; 277	5; 5; 5; 2; 2	A1.A5.NODE_1681_length_4341_cov_153.411354_g855_i0.p1	A0A183V2K2	Aminopeptidase	5	5	5	12.3	12.3	93.363	829	35.797	29698000
8	A2.A4.R2367585.p1; A1.A5.NODE_8048_length_2430_cov_2029.225388_g3758_i0.p1; A1.A5.NODE_13683_length_1771_cov_5591.310185_g6035_i0.p1; A1.A0.NODE_12495_length_1371_cov_1630.502280_g6880_i0.p1; A1.A0.NODE_11214_length_1526_cov_1313.897349_g6132_i0.p1; A1.A4.NODE_11079_length_1889_cov_696.337662_g1126_i1.p2; A1.A5.NODE_10569_length_2104_cov_3773.025716_g3758_i1.p3; A1.A1.NODE_41448_length_311_cov_55…	181; 181; 190; 129; 136; 136; 139; 103	4; 4; 4; 2; 2; 2; 2; 1	A2.A4.R2367585.p1	A0A0B2V816	Lactoylglutathione lyase	4	4	4	30.9	30.9	20.612	181	34.822	26287000
7	A2.A4.R2367201.p1; A1.A4.NODE_8979_length_2202_cov_3173.111060_g4536_i0.p1; A1.A5.NODE_19927_length_1288_cov_2183.970281_g8428_i0.p1; A2.A5.R3297788.p1; A1.A0.NODE_25335_length_463_cov_2.235294_g17038_i0.p1; A1.A6.NODE_10537_length_1510_cov_857.493585_g2767_i2.p1; A1.A0.NODE_14082_length_1196_cov_98.443471_g5010_i3.p1	182; 126; 143; 141; 153; 106; 171	8; 7; 5; 4; 4; 1; 1	A2.A4.R2367201.p1	A0A0B2UVT1	Peptidyl-prolyl cis-trans isomerase	8	4	4	28.6	28.6	19.824	182	34.49	130290000
3	A1.A5.NODE_3863_length_3329_cov_316.716372_g4_i32.p2; A1.A0.NODE_14340_length_1170_cov_10.504036_g8001_i0.p1; A1.A1.NODE_17698_length_1388_cov_111.653293_g8056_i0.p1	269; 320; 295	5; 5; 4	A1.A5.NODE_3863_length_3329_cov_316.716372_g4_i32.p2	A0A0K0DZI8	Metalloendopeptidase	5	5	5	17.5	17.5	30.702	269	33.895	35114000
2	A2.A1.R3299402.p2; A1.A0.NODE_1662_length_4107_cov_354.393633_g924_i0.p2	283; 204	5; 4	A2.A1.R3299402.p2	A0A0M3K232	Voltage-dependent anion-selective channel protein 3	5	5	5	26.1	26.1	30.988	283	33.447	40861000
9	A1.A0.NODE_4336_length_2797_cov_710.235594_g2260_i1.p1; A1.A0.NODE_4173_length_2854_cov_695.360129_g2260_i0.p1; A2.A2.J727309.p1; A1.A6.NODE_2900_length_3119_cov_328.841100_g1762_i0.p1; A1.A4.NODE_5853_length_2785_cov_895.415816_g3100_i0.p1; A1.A5.NODE_5283_length_2933_cov_684.365744_g1606_i1.p1; A1.A5.NODE_3222_length_3557_cov_517.429425_g1606_i0.p1; A1.A4.NODE_6183_length_2713_cov_633.707710_g3…	461; 504; 517; 340; 449; 570; 339; 105; 117	4; 4; 4; 3; 3; 3; 2; 1; 1	A1.A0.NODE_4336_length_2797_cov_710.235594_g2260_i1.p1	A0A0M3K9X8	Carboxylic ester hydrolase	4	4	4	20.6	20.6	51.491	461	31.951	31510000
8	A1.A4.NODE_5626_length_2846_cov_375.439216_g658_i6.p1; A2.A0.J3515520.p1; A1.A0.NODE_18047_length_835_cov_31.298718_g10486_i0.p1; A1.A5.NODE_24424_length_1010_cov_133.890383_g7084_i3.p1; A1.A4.NODE_5214_length_2951_cov_44.910997_g658_i5.p1; A1.A1.NODE_14000_length_1755_cov_178.521327_g6087_i1.p1; A1.A0.NODE_10960_length_1559_cov_37.976729_g5990_i0.p1; A1.A5.NODE_21031_length_1217_cov_162.423339_g…	264; 161; 132; 144; 161; 195; 195; 219	5; 4; 3; 2; 2; 2; 2; 2	A1.A4.NODE_5626_length_2846_cov_375.439216_g658_i6.p1	A0A0M3JZT1	Component 3 of promoter of RISC	5	5	5	25.8	25.8	30.1	264	31.788	40835000
6	A1.A4.NODE_6203_length_2709_cov_473.455772_g3253_i0.p1; A1.A0.NODE_6971_length_2173_cov_752.881964_g3735_i0.p1; A1.A4.NODE_6214_length_2707_cov_319.253938_g3253_i1.p2; A1.A0.NODE_6971_length_2173_cov_752.881964_g3735_i0.p2; A1.A4.NODE_28133_length_422_cov_1.118110_g16480_i0.p1; A2.A0.S2550021.p1	340; 209; 121; 178; 140; 144	5; 3; 2; 2; 1; 1	A1.A4.NODE_6203_length_2709_cov_473.455772_g3253_i0.p1	F1L8D7	IDP	5	5	3	16.5	12.1	38.623	340	31.774	18956000
6	A1.A1.NODE_6064_length_2911_cov_2103.047468_g1220_i2.p1; A2.A1.R3298841.p1; A1.A6.NODE_694_length_5094_cov_397.202369_g341_i1.p1; A1.A5.NODE_3623_length_3415_cov_1140.587189_g1786_i0.p1; A1.A6.NODE_514_length_5577_cov_363.650865_g341_i0.p1; A1.A5.NODE_14233_length_1723_cov_365.573214_g6247_i0.p1	330; 342; 407; 186; 233; 187	4; 4; 4; 3; 3; 1	A1.A1.NODE_6064_length_2911_cov_2103.047468_g1220_i2.p1	KHN70645.1	Phosphate carrier protein, mitochondrial	4	4	4	22.7	22.7	36.821	330	31.48	34499000
9	A1.A5.NODE_4532_length_3130_cov_599.330418_g696_i1.p1; A1.A4.NODE_2393_length_3929_cov_489.891975_g1361_i0.p1; A1.A0.NODE_4165_length_2856_cov_689.192431_g2257_i0.p1; A1.A6.NODE_7416_length_1958_cov_185.869362_g4319_i0.p1; A1.A1.NODE_4037_length_3482_cov_1079.385359_g2092_i0.p1; A1.A0.NODE_4165_length_2856_cov_689.192431_g2257_i0.p2; A2.A0.R3519370.p1; A2.A1.R3301514.p2; A2.A4.S2545571.p1	215; 133; 149; 157; 186; 122; 191; 217; 137	5; 3; 3; 3; 3; 2; 2; 2; 1	A1.A5.NODE_4532_length_3130_cov_599.330418_g696_i1.p1	AXS78235.1	Ras-related protein Rab-11B	5	5	5	32.1	32.1	23.894	215	30.496	12964000
4	A1.A5.NODE_4474_length_3145_cov_58.457769_g2190_i0.p1; A2.A1.R3307348.p1; A1.A5.NODE_4917_length_3029_cov_61.806765_g2190_i1.p1; A1.A1.NODE_5818_length_2968_cov_139.503275_g2876_i1.p1	582; 715; 857; 618	5; 5; 5; 4	A1.A5.NODE_4474_length_3145_cov_58.457769_g2190_i0.p1	A0A183UYJ4	V-type proton ATPase subunit a	5	5	5	11	11	66.74	582	30.401	8774800
3	A1.A4.NODE_8196_length_2327_cov_699.925197_g3455_i2.p1; A1.A4.NODE_6675_length_2598_cov_610.086820_g3455_i0.p1; A1.A1.NODE_9763_length_2271_cov_968.052178_g4650_i0.p1	297; 247; 215	5; 4; 3	A1.A4.NODE_8196_length_2327_cov_699.925197_g3455_i2.p1	A0A0M3KAE3	Transaldolase	5	5	5	17.8	17.8	33.591	297	29.689	26900000
15	A1.A1.NODE_12452_length_1927_cov_24024.517204_g5817_i0.p1; A2.A4.R2367109.p1; A2.A0.R3468975.p1; A1.A1.NODE_516_length_6511_cov_8004.102576_g283_i0.p1; A1.A1.NODE_2671_length_4059_cov_11146.091934_g283_i8.p1; A1.A0.NODE_910_length_4994_cov_2850.125329_g512_i0.p1; A1.A1.NODE_1766_length_4623_cov_7510.109087_g283_i5.p1; A1.A0.NODE_941_length_4947_cov_2871.562960_g512_i1.p1; A1.A5.NODE_4462_length_3…	401; 464; 517; 517; 363; 448; 466; 328; 328; 118; 184; 189; 207; 234; 264	4; 4; 4; 4; 3; 3; 3; 2; 2; 1; 1; 1; 1; 1; 1	A1.A1.NODE_12452_length_1927_cov_24024.517204_g5817_i0.p1	B5RHZ9	Elongation factor 1-alpha	4	4	4	22.4	22.4	43.39	401	27.778	35550000
1	A2.A1.R3300374.p1	127	4	A2.A1.R3300374.p1	????	NA	4	4	4	36.2	36.2	14.363	127	26.044	81322000
4	A1.A5.NODE_8969_length_2308_cov_69.007947_g4159_i0.p1; A2.A1.R3302865.p1; A1.A1.NODE_3816_length_3556_cov_81.386644_g1988_i0.p1; A1.A1.NODE_3816_length_3556_cov_81.386644_g1988_i0.p3	515; 619; 261; 137	4; 4; 3; 1	A1.A5.NODE_8969_length_2308_cov_69.007947_g4159_i0.p1	KHN82728.1	Gamma-glutamyltranspeptidase 1	4	4	4	10.1	10.1	57.286	515	25.729	49405000
11	A2.A4.R2367230.p1; A1.A4.NODE_3947_length_3309_cov_1673.603427_g2163_i0.p1; A1.A0.NODE_7625_length_2051_cov_2115.984970_g4095_i0.p2; A1.A1.NODE_11403_length_2059_cov_4593.081827_g3881_i2.p1; A1.A1.NODE_11403_length_2059_cov_4593.081827_g3881_i2.p3; A1.A4.NODE_3947_length_3309_cov_1673.603427_g2163_i0.p2; A1.A6.NODE_13209_length_1201_cov_821.863481_g5339_i2.p1; A1.A0.NODE_7625_length_2051_cov_2115…	420; 165; 173; 387; 108; 108; 128; 201; 254; 254; 280	4; 3; 3; 3; 1; 1; 1; 1; 1; 1; 1	A2.A4.R2367230.p1	XP_001901841.1	Elongation factor 1 gamma, conserved domain containing protein	4	4	4	8.6	8.6	47.109	420	24.62	8325400
4	A1.A4.NODE_17280_length_1173_cov_3416.105124_g8295_i0.p1; A1.A5.NODE_20069_length_1279_cov_2355.389159_g8501_i0.p1; A1.A4.NODE_18356_length_1061_cov_4011.814706_g8853_i0.p1; A1.A5.NODE_20817_length_1231_cov_2499.962963_g8501_i1.p1	112; 191; 230; 256	4; 4; 4; 4	A1.A4.NODE_17280_length_1173_cov_3416.105124_g8295_i0.p1	A0A3P6NUD5	Thioredoxin domain-containing protein	4	4	4	42	42	12.56	112	24.413	76622000
3	A1.A1.NODE_2970_length_3909_cov_54.027330_g1234_i1.p1; A1.A1.NODE_2287_length_4262_cov_47.661502_g1234_i0.p1; A1.A5.NODE_1833_length_4237_cov_41.732475_g942_i0.p1	546; 366; 381	4; 2; 2	A1.A1.NODE_2970_length_3909_cov_54.027330_g1234_i1.p1	KHN73592.1	putative glutathione reductase 2	4	4	4	9.3	9.3	60.255	546	23.763	12447000
10	A1.A0.NODE_9499_length_1757_cov_522.743243_g5141_i0.p1; A2.A1.R3298775.p2; A1.A4.NODE_13646_length_1563_cov_853.923127_g5070_i1.p1; A1.A1.NODE_17321_length_1421_cov_3682.802068_g4951_i3.p1; A1.A1.NODE_37376_length_364_cov_2.043771_g23565_i0.p1; A1.A1.NODE_31190_length_514_cov_1.257271_g17402_i0.p1; A2.A1.R3442462.p1; A1.A0.NODE_19212_length_752_cov_16.060258_g11374_i0.p1; A2.A4.S2356817.p1; A1.A1…	154; 218; 228; 246; 121; 171; 193; 208; 213; 225	4; 4; 4; 4; 1; 1; 1; 1; 1; 1	A1.A0.NODE_9499_length_1757_cov_522.743243_g5141_i0.p1	???	NA	4	4	4	21.4	21.4	17.845	154	22.649	4733600
a Herein, and for all other columns, we followed the definitions and parameters as in MaxQuant (ver. 1.6.0.16). Identifier(s) of protein(s) contained in the Protein Group created by the built-in Andromeda searching
b Lenght of all sequences of proteins contained in the group
c Number of peptides associated with each protein in protein group, occuring in the order as the protein IDs occur in the 'IDs' column
d When the same peptide sequences is assigned to diverse proteins in the reference database, here only the ID of proteins with a more confident identification is reported for sake of clarity
e Total number of peptide sequences associated with all proteins in the group
f Total number of razor and unique peptides sequences associated with protein in the group (i.e. these peptides are shared with another protein group).
g Total number of razor and unique peptides sequences associated with protein in the group (i.e. these peptides are not shared with another protein group).
h Percentage of the sequence that is covered by the identified unique and razor peptides of the best protein sequence contained in the group.
i Percentage of the sequence that is covered by the identified unique peptides of the best protein sequence contained in the group.
j Molecular weights of the leading sequence contained in the group.
k The lenght of the leading sequence contained in the group.
l Score for the protein identification, determined by multiplying each peptide posterior error probabilities (PEPs). The larger this score, the more certain is the identification of a protein.
m Summed up the eXtracted Ion Current of all isotopic clusters associated con with the identified aminioacid sequences for each protein group
