# Supplementary material for: Proteomic characterization of extracellular vesicles released by third stage larvae of the zoonotic parasite Anisakis pegreffii (Nematoda: Anisakidae)
Source: Front Cell Infect Microbiol. 2023 Mar 15;13:1079991. doi: 10.3389/fcimb.2023.1079991 (PMC10050594; doi:10.3389/fcimb.2023.1079991)
Supplement: Supplementary file 4 [file Table_2.xlsx]

## Sheet: EV proteins
S2 File. List of codes reported in Figure 6.
Protein name	Abbreviation
6-phosphogluconate dehydrogenase, decarboxylating	6PGDH
Transaldolase	TALDO
Putative Aldehydehydrogenase family 7 member A1-likeprotein	ALDH7A1
Actin-2	ACT2
Heat shock protein 90	HSP90
Glycogen phosphorylase	GP
14-3-3 zeta	YWAB
Peroxiredoxin	PRX
Elongation factor 2	EF2
Adenosylhomocysteinase	AHCY
Glyceraldehyde-3-phosphate dehydrogenase	GAPDH
C-1-tetrahydrofolate synthase, cytoplasmic	C1-THF synthase
PPIase cyclophilin-type domain-containing protein	ZC250.5
2-phospho-D-glycerate hydro-lyase/glycolytic enzyme enolase	ENO
Glucose-6-phosphate isomerase	G6PI
Phosphoglycerate kinase	PGK
1,4-alpha-glucan branching enzyme	GBE
Peptidyl-prolyl cis-trans isomerase	PPIase
Thioredoxin domain containing protein	TXNDC
Dihydrolipoyldehydrogenase	DLD
ADP/ATP translocase	AAT
Malate dehydrogenase	MDH
Rab GDP dissociation inhibitor	Rab GDI
S-(hydroxymethyl)glutathione	S-HMG
H(+)-transporting two-sector ATPase	H(+)-ATPase

## Sheet: Tursiops truncatus
S2 File. List of codes reported in Figure 6.
Code	Protein name	Abbreviation
A0A2U4C2P8	polyubiquitin-B isoform X1	UBB
A0A2U4C1R5	14-3-3 protein beta/alpha	YWHAB
A0A6J3S3J3	RuvB-like helicase	RUVBL1
A0A2U3V7Y4	protein N-lysine methyltransferase	METTL21A
A0A6J3QDF9	hsp70-binding protein 1 isoform X1	HSPBP1
A0A6J3QDS9	hsp70-binding protein 1 isoform X2	HSPBP1X2
A0A2U4BN76	protein N-lysine methyltransferase METTL21A isoform X2	METTL21A
A0A6J3QSE5	androgen receptor isoform X3	ARX3
A0A6J3QRZ5	androgen receptor isoform X2	ARX2
A0A2U3V2H0	Androgen receptor	AR
A0A6J3QGS0	RuvB-like helicase	RUVBL2
A0A2U4ATM3	protein-lysine N-methyltransferase EEF2KMT isoform X1	EEF2KMT
A0A6J3QHB4	RuvB-like helicase	RUVBL2
A0A6J3R9X1	IQ calmodulin-binding motif-containing protein 1 isoform X2	IQCB1X2
A0A2U3V4B0	carnitine O-palmitoyltransferase 2, mitochondrial isoform X1	CPT2
A0A6J3R4D2	sequestosome-1	SQSTM1
A0A6J3RI97	Gelsolin	GSN
A0A6J3QHG0	BRD4-interacting chromatin-remodeling complex-associated protein isoform X2	BICRA
A0A2U4AC85	IQ calmodulin-binding motif-containing protein 1 isoform X1	IQCB1X1
A0A6J3R806	torsin-1A-interacting protein 1 isoform X3	TOR1AIP1
A0A2U4BYS4	ras-related protein Rab-1A	RAB1A
A0A6J3QMA7	VT	VTN
A0A2U4BMT4	Fibronectin	FN1
A0A6J3RUH4	Macrophage colony-stimulating factor 1	CSF1
A0A6J3RUB2	Macrophage colony-stimulating factor 1	CSF1
A0A6J3RUD9	macrophage colony-stimulating factor 1 isoform X4	CSF1
A0A6J3RUI3	macrophage colony-stimulating factor 1 isoform X3	CSF1
A0A6J3RFI2	ras-related protein Rab-5A-like	Rab5A-like
A0A2U4BVL6	Ras-related protein Rab-4	RAB4A
A0A2U4BVK8	ras-related protein Rab-4A isoform X2	RAB4A
A0A6J3R975	ras-related protein Rab-5A isoform X1	RAB5A
A0A6J3QCW7	Ras-related protein Rab-4	RAB4B
A0A6J3RJY3	Protein transport protein sec16	SEC16A
A0A2U3V2H0	Androgen receptor	AR
A0A6J3QHB4	RuvB-like helicase	RUVBL2
A0A2U4ATM3	protein-lysine N-methyltransferase EEF2KMT isoform X1	EEF2KMT
A0A2U3V4B0	carnitine O-palmitoyltransferase 2, mitochondrial isoform X1	CPT2
A0A2U4BEB1	cyclin-dependent kinase 1	CDK1
A0A6J3R9X1	IQ calmodulin-binding motif-containing protein 1 isoform X2	IQCB1
A0A2U4ACB5	Serine/threonine-protein phosphatase 2A 56 kDa regulatory subunit	PPP2R5E
A0A6J3QGS0	RuvB-like helicase	RUVBL2
A0A2U4ATN0	protein-lysine N-methyltransferase EEF2KMT isoform X3	EEF2KMT
A0A6J3S4K5	2-iminobutanoate/2-iminopropanoate deaminase	LOC109551331
A0A6J3QSE5	androgen receptor isoform X3	AR
A0A6J3RI21	Gelsolin	GSN
A0A6U3RMB3	NA	NA
A0A6J3RWP3	laminin subunit beta-1	LAMB1
A0A6J3QHH9	BRD4-interacting chromatin-remodeling complex-associated protein isoform X1	BICRA
A0A6J3QCU5	ras-related protein Rab-4B isoform X2	RAB4B
A0A2U4BW18	RNA helicase	DDX6

## Sheet: Homo sapiens
S2 File. List of codes reported in Figure 6.
Code	Protein name	Abbreviation
P20339	Ras-related protein Rab-5A	RAB5A
P62820	Ras-related protein Rab-1A	RAB1A
P61018	Ras-related protein Rab-4B	RAB4B
P06396	Gelsolin	GSN
P50552	Vasodilator-stimulated phosphoprotein	VASP
P10275	Androgen receptor	AR
Q9NZM4	BRD4-interacting chromatin-remodeling complex-associated protein	BICRA
Q9NZL4	Hsp70-binding protein 1	HSPBP1
P06493	Cyclin-dependent kinase 1	CDK1
Q8WXB1	Protein N-lysine methyltransferase	METTL21A
P07737	Profilin-1	PFN1
Q9Y265	RuvB-like 1	RUVBL1
Q9Y230	RuvB-like 2	RUVBL2
Q8N7N1	Putative protein N-methyltransferase	FAM86B1
Q96G04	Protein-lysine N-methyltransferase	EEF2KMT
P0C5J1	Putative protein N-methyltransferase	FAM86B2
P43355	Melanoma-associated antigen 1	MAGEA1
P07942	Laminin subunit beta-1	LAMB1
P04004	Vitronectin	VTN
P09603	Macrophage colony-stimulating factor 1	CSF1
P26196	Probable ATP-dependent RNA helicase	DDX6
P31946	14-3-3 protein beta/alpha	YWHAB
Q13501	Sequestosome-1	SQSTM1
P23786	Carnitine O-palmitoyltransferase 2, mitochondrial	CPT2
Q15051	IQ calmodulin-binding motif-containing protein 1	IQCB1
P04637	Cellular tumor antigen p53	TP53
P20338	Ras-related protein Rab-4A	RAB4A
